Pilot Paper outline for *PLoS NTDs*

**Full title:**

**Comparison of collection methods for *Phlebotomus argentipes* sand flies to use in a molecular xenomonitoring system for the surveillance of visceral leishmaniasis**

**Short title:**

**Collection methods for molecular xenomonitoring of sand flies**

Shannon McIntyre-Nolan,<sup>1¶</sup> Vijay Kumar,<sup>2¶</sup> Miguella Mark Carew,<sup>1</sup> Kundan Kumar,<sup>2</sup> Emily Nightingale,<sup>3</sup> Giorgia Dalla Libera Marchiori,<sup>1</sup> Matthew Rogers,<sup>1</sup> Mojca Kristan,<sup>1</sup> Susana Campino,<sup>4</sup> Graham F. Medley,<sup>3</sup> Pradeep Das,<sup>5&</sup> Mary Cameron<sup>1&\*</sup>

<sup>1</sup> Department of Disease Control, London School of Hygiene & Tropical Medicine, London, UK

<sup>2</sup> Rajendra Memorial Research Institute of Medical Sciences, Patna, India

<sup>3</sup> Department of Global Health and Development, London School of Hygiene & Tropical Medicine, London, UK

<sup>4</sup> Department of Infection Biology, London School of Hygiene & Tropical Medicine, London, UK

<sup>5</sup> Department of Molecular Parasitology, National Institute of Cholera and Enteric Diseases, Kolkata 10, India

\*Corresponding author

Email: [mary.cameron@lshtm.ac.uk](mailto:mary.cameron@lshtm.ac.uk)

<sup>¶</sup>These authors contributed equally to this work

<sup>&</sup>These authors also contributed equally to this work

**NOTE: This preprint reports new research that has not been certified by peer review and should not be used to guide clinical practice.**

## Abstract

**Background:** The kala-azar elimination programme has resulted in a significant reduction in visceral leishmaniasis (VL) cases across the Indian Subcontinent. To detect any resurgence of transmission, a sensitive cost-effective surveillance system is required. Molecular xenomonitoring (MX), detection of pathogen DNA/RNA in vectors, provides a proxy of human infection in the lymphatic filariasis elimination programme. To determine whether MX can be used for VL surveillance in a low transmission setting, large numbers of the sand fly vector *Phlebotomus argentipes* are required. This study will determine the best method for capturing *P. argentipes* females for MX.

**Methodology/Principal Findings:** The field study was performed in two programmatic and two non-programmatic villages in Bihar, India. A total of 48 households (12/village) were recruited. Centers for Disease Control and Prevention light traps (CDC-LTs) were compared with Improved Prokopack (PKP) and mechanical vacuum aspirators (MVA) using standardised methods. Four 12x12 Latin squares, 576 collections, were attempted (12/house, 144/village, 192/method). Molecular analyses of collections were conducted to confirm identification of *P. argentipes* and to detect human and *Leishmania* DNA. Operational factors, such as time burden, acceptance to householders and RNA preservation, were also considered. A total of 562 collections (97.7%) were completed with 6,809 sand flies captured. Females comprised 49.0% of captures, of which 1,934 (57.9%) were identified as *P. argentipes*. CDC-LTs collected 4.04 times more *P. argentipes* females than MVA and 3.62 times more than PKP ( $p < 0.0001$  for each). Of 21,735 mosquitoes in the same collections, no significant differences between collection methods were observed. CDC-LTs took less time to install and collect than to perform aspirations and their greater yield compensated for increased sorting time. CDC-LTs were favoured by householders.

**Conclusions/Significance:** CDC-LTs are the most useful collection tool of those tested for MX surveillance since they collected higher numbers of *P. argentipes* females without compromising mosquito captures or the preservation of RNA. However, capture rates are still low.

## Author Summary

Molecular xenomonitoring, screening insects for pathogen DNA/RNA, may be used for surveillance of diseases transmitted by insects. Since the proportion of insects infected with pathogens is very low in areas targeted for disease elimination, large numbers of females need to be screened. We compared three different methods for collecting *Phlebotomus argentipes* sand fly females, the vector of parasites causing the disease visceral leishmaniasis in the Indian subcontinent, to determine which collected the largest number of females. Other factors that may also influence selection of a particular method of collection by a disease control programme, such as the time it takes to collect and sort samples, the acceptance of householders for a particular

collection method and whether RNA degradation in insect samples differed between collection methods, were also considered. Centers for Disease Control and Prevention light traps (CDC-LTs) proved to be more useful than two types of aspiration methods for collecting higher numbers of sand fly females and RNA preservation was retained. Furthermore, they took less time to install than to perform aspirations and were favoured by householders. Therefore, CDC-LTs were considered to be the most suitable collection method for molecular xenomonitoring of sand flies in India.

**Keywords:**

Molecular xenomonitoring, visceral leishmaniasis, neglected tropical diseases (NTDs), disease surveillance, disease elimination, *Phlebotomus argentipes*, *Leishmania donovani*

## 1 **Introduction**

2

### 3 **Visceral Leishmaniasis (VL) Epidemiology and Transmission in India**

4 Across the Indian Subcontinent (ISC) VL, also known as kala-azar, is an anthroponotic disease  
5 caused by the parasite *Leishmania donovani*. It is vectored by only one incriminated sand fly  
6 species, *Phlebotomus argentipes* (1). In 2005, Bangladesh, India and Nepal accounted for 70%  
7 of the global VL burden but, given its epidemiology in the region, together with newer tools for  
8 diagnosis and treatment, the prospect of elimination of VL as a public health problem became a  
9 feasible goal. Consequently, a memorandum of understanding was signed by the three regional  
10 members at the WHO Headquarters in Geneva, Switzerland to eliminate VL as a public health  
11 problem with an agreed target to reduce incidence to below 1 case/10,000 population at the  
12 country's appropriate administration level, upazila, block, or sub-district, by 2015 (2).

13

14 Since the implementation of the elimination strategy, consisting of rapid case detection, treatment  
15 of VL cases and vector control using indoor residual spraying (IRS), and the accelerated plan for  
16 elimination practiced by the National Vector Borne Disease Control Programme (NVBDCP) in  
17 India (3), the number of reported VL cases in Bangladesh, India, and Nepal has declined sharply,  
18 from 41,158 in 2005 to 4,692 in 2018, and the global burden of VL in the ISC has reduced from  
19 70% in 2005 to an unprecedented low of 27% (4). Bangladesh and Nepal have reached the  
20 elimination target in all endemic areas, while India has reached the target in 714/751 (95%)  
21 endemic blocks (i.e. those deemed to have on-going transmission). In 2019, all 37 blocks that  
22 were above target were located in two of four VL endemic states: Bihar and Jharkhand (21 and  
23 16 blocks, respectively) (5).

24 This progress is welcomed, but it brings enormous challenges to the National Kala-azar  
25 Elimination Programme since, as VL cases become scarce, it is crucial to have sensitive and  
26 cost-effective surveillance systems in place to determine whether elimination targets have been  
27 met and sustain control to prevent resurgence. Molecular xenomonitoring (MX) is a vector-based  
28 pathogen surveillance system, detecting pathogen DNA/RNA in a vector as a proxy of human  
29 infection, that may serve as a useful alternative to monitoring human infection and residual  
30 transmission in this low-transmission context (6).

### 31 **Molecular Xenomonitoring (MX)**

32 Much of the previous literature on MX concerns its use in lymphatic filariasis (LF) elimination  
33 programmes, where endpoints of transmission have been established through several decades  
34 of research, to determine whether transmission is still occurring after mass drug administration  
35 (MDA) (6). Establishing the appropriate sample size for a given MX system depends on its goal.

36 For elimination, endpoints of transmission are used to determine if elimination is nearing, has  
37 been achieved, or has been sustained (6). Sample size calculations depend on estimates from  
38 existing literature on vector abundance and infection prevalence (ideally from the same, nearby,  
39 or characteristically similar sites). In areas where elimination activities are underway, and human  
40 and vector infection prevalence have or can be assumed to have decreased, significantly more  
41 vectors will be required to detect low infection levels than if infection levels were high (6). For  
42 example, for LF elimination surveillance, the numbers of mosquitoes required to obtain accurate  
43 filarial prevalence rates in different geographical settings post-MDA depends on vector efficiency  
44 and may be as high as 5,000 - 7,500 *Culex quinquefasciatus*, 2,500 *Anopheles* and 22,000 *Aedes*  
45 females (7).

46  
47 Consequently, several studies were performed to obtain the large numbers of mosquitoes  
48 required and to gain an understanding of their behaviour since this influences the ideal tool and  
49 method of collection (6). In general, for *Cx. quinquefasciatus*, Centers for Disease Control (CDC)  
50 and Prevention gravid traps (GTs) baited with odorous infusions, exploiting oviposition behaviour,  
51 are placed outside of houses and are the preferred method for collecting gravid adult females.  
52 However, a comparison of collection methods in Brazil found that large battery-powered  
53 aspirators, exploiting host-seeking behaviour, collected 38 times more blood-fed and 5 times more  
54 gravid *Cx. quinquefasciatus* than CDC light traps (LTs) placed inside houses (8). Furthermore,  
55 residents preferred aspirators over fixed battery or AC powered traps (e.g., CDC-LTs) due to  
56 lower risk of battery theft, power cuts, and the nuisance of light and noise in the bedroom at night  
57 (8). Similarly, for arbovirus surveillance, common methods for collecting mosquitoes have known  
58 advantages and disadvantages (9). However, the optimal collection method to use for *P.*  
59 *argentipes*, to develop an MX system for *L. donovani* DNA surveillance, has not been explored.

60  
61 **Rationale for MX system for VL surveillance in India**

62 A better understanding of the transmission dynamics of VL, in particular of how rates of infection  
63 in humans and sand flies vary as functions of each other, is required to guide VL elimination  
64 efforts and ensure sustained elimination in the ISC. By collecting contemporary entomological  
65 and human data in the same geographical locations, more precise epidemiological models can  
66 be produced allowing MX endpoints of VL transmission to be determined similar to those obtained  
67 for LF. For example, the entomological inoculation rate (EIR), a product of the human bloodmeal  
68 index (HBI) and the proportion of vectors that are infective, a useful proxy for human infection in  
69 malaria control programmes, is unknown for VL (10). In order to calculate the EIR for VL in the  
70 ISC, a suitable collection method to obtain large numbers of *P. argentipes* females is required.

71

72 Systematic longitudinal sampling of *P. argentipes* populations to monitor the impact of IRS on  
73 their abundance, HBI, and the presence of *L. donovani* infection is not performed routinely in  
74 India, Bangladesh or Nepal. Nevertheless, several research studies have captured *P. argentipes*  
75 for different purposes, and the most common methods use either mouth aspirations or CDC-LTs  
76 placed in human dwellings or in cattle sheds (11). Specific details concerning trap placement and  
77 measures taken to standardize collections, which is a particularly important concern when mouth  
78 aspirations are used, are often missing from surveys making comparisons between them difficult.  
79 Furthermore, collections of blood-fed females are often limited, which adds to the potential bias  
80 arising through sampling procedures and can lead to data misinterpretation (12). More recently,  
81 studies in Bihar have improved the standardization of collections using CDC-LTs and found that  
82 *P. argentipes* feed preferentially on humans and, a higher proportion of human-fed *P. argentipes*  
83 are found in cattle enclosures (55%) compared with houses (31%) (13, 14).

84  
85 The first study to examine natural infection rates of *P. argentipes* with *L. donovani* in Bihar  
86 collected a total of 14,585 sand flies using CDC miniature light traps and mouth aspirators in the  
87 Muzaffarpur district (15). Of these, a subset of 449 *P. argentipes* females were divided into pools  
88 for molecular detection of the 18S rRNA gene using PCR, but the overall prevalence of infection  
89 in *P. argentipes* for *L. donovani* DNA was over estimated as 4.90-17.37% because the number of  
90 individual sand flies that may be positive in a single pool was not taken into account (15).  
91 Subsequently, more reliable estimates were obtained using individual sand flies and infection  
92 rates of *P. argentipes* with *L. donovani* DNA were found to vary according to season: 1.0% (4/384)  
93 in summer, 0.9% (5/591) in the rainy season and 2.8% (12/422) in winter (16). However, this  
94 study was performed over a single year, and morphological identifications were not confirmed  
95 using molecular methods, so further work is required to examine seasonal trends. Since then,  
96 studies have collected *P. argentipes* using CDC-LTs and/or mouth aspirators (14, 17) but no  
97 natural infection rates of *P. argentipes* for *L. donovani* DNA were published in the last seven years  
98 prior to the commencement of the present study.

99 The primary aim of the present study is to compare collection methods to determine which method  
100 collects the largest number of *P. argentipes* females for use in subsequent epidemiological  
101 studies where the EIR and endpoints for transmission will be calculated. CDC gravid traps (CDC-  
102 GTs), baited with water rather than organic infusions for indoor use, were a method considered  
103 for inclusion because of their widescale deployment in LF surveillance, but they were not selected  
104 in the present trial since it was previously shown that collections of sand flies (including live as  
105 well as dead females of different physiological stages), were higher in CDC-LTs than in CDC-GTs  
106 in Odisha, India (18). Therefore, CDC-LTs, often considered a 'gold standard' for *P. argentipes*  
107 (11), will be compared with two different types of battery-operated aspirators that were shown to

108 collect more mosquitoes resting indoors than CDC-LTs or CDC backpack aspirators in earlier  
109 trials (8, 19). Although *P. argentipes* is the primary species of interest, incidental captures of  
110 mosquito females will also be analysed. In addition to entomological indicators, including human  
111 bloodmeal analysis and *L. donovani* infection rates, operational factors relating to the time burden  
112 of different collection methods, and their acceptance to householders, will be examined.

113 Another important consideration when selecting an appropriate collection technique for MX is  
114 whether pathogen RNA is preserved in the vector during collection and subsequent transportation  
115 prior to storage at -80°C. RNA detection is required for screening vectors for the infective stages  
116 of parasites, the metacyclic stages in the case of *Leishmania*, to measure EIR. To preserve the  
117 integrity of samples, a cold chain is required during transport of samples to the laboratory where  
118 they can be placed in RNA preservative media and frozen (9, 20). However, it is possible that the  
119 different conditions experienced by sand flies between collection methods, where sand flies are  
120 placed in a cool bag immediately after aspiration versus being trapped in a CDC-LT for possibly  
121 12 or more hours before being placed in a cool bag, may compromise RNA preservation which  
122 will be addressed through a laboratory experiment simulating field conditions.

123

## 124 **Methods**

125

### 126 **Study Sites**

127 The field study was performed in Bihar, the state in India with the highest incidence of VL. Two  
128 villages each in Nalanda (Ruchanpura, also known as Kosiawan, in Ekangarsarai block and  
129 Dharampur in Thartari block) and Saran (Bishambharpur and Rampur Jagdish, both in Dariapur  
130 block) districts were selected for sand fly collection (Fig 1). Nalanda is located south of the Ganges  
131 River (25° 12' 0" N, 85° 31' 12" E); the Ganges River forms the southern border of Saran (25° 55'  
132 0" N, 84° 45' 0" E). Travel distance to the villages from Rajendra Memorial Research Institute of  
133 Medical Sciences (RMRIMS), where the field team were based, ranged from 41-50 kilometres  
134 (per Google Maps) and travel time was estimated to be between 1.5 to 2.5 hours depending on  
135 traffic conditions.

136

137 **Fig 1.** Location of study villages and RMRIMS in Bihar, India.

138

139

140 Nalanda villages were defined as non-programmatic villages, i.e. at the time of sampling they met  
141 and sustained the Government of India's elimination target of <1 VL case reported/10,000  
142 population at the block level over a three-year period, and no IRS or other vector control activities

143 occurred in the five years preceding this study. Saran villages were defined as programmatic  
144 villages, meaning that they were above the elimination target at the time of sampling and should  
145 receive IRS twice during the calendar year.

146  
147 Household sampling sites were identified in each village based on pre-study vector surveys. The  
148 final selection of households included human-only and combined human-cattle dwellings.  
149 Replacement was needed for three households over the course of the study.

150

151

## 152 **Collection Method Comparison (CMC)**

### 153 *Sample Size Calculation*

154 Prior to the start of the study, a sample size calculation using data collected during a previous  
155 trial conducted in Bihar, where a mean of 1.9776 *P. argentipes* females, with a standard deviation  
156 of 3.2512, were collected with CDC-LTs per trap night (21), determined that 166 trap  
157 nights/collection method was sufficient to detect a difference of one sand fly in the mean number  
158 of *P. argentipes* females collected by each of the three methods (where  $\alpha = 0.05$ ;  $\beta = 0.20$ ). To  
159 determine the best practice for sampling female *P. argentipes* sand flies, CDC-LTs (John Hock)  
160 were compared with improved Prokopack aspirators (PKP) (John Hock) and mechanical vacuum  
161 aspirators (MVA) (Horst Armadilhas).

162

### 163 *Design*

164 A total of 48 households (12 from each of the four villages) were recruited for regular indoor  
165 sampling four days a week over 12 weeks from 25 June to 14 September 2018. Using a Latin  
166 Square design balanced for carryover effects, the three collection methods were rotated through  
167 each household with four 12x12 Latin Squares (rounds) over the study period. A total of 576  
168 collection events were expected (288 events per district, 144 events per village, 192 collection  
169 events per collection method, and 12 collection events per household).

170

### 171 *CDC-LT Protocol*

172 When allocated, a CDC-LT was installed in each of participating households and turned on  
173 between 18.00 hours and 06.00 hours based on the day of treatment according to the Latin square  
174 design. Batteries (6V 12 amp) were charged at RMRIMS prior to installation. CDC-LTs were hung  
175 in the room where most household residents slept at a distance 15cm from the wall of the house  
176 with the base of the collection pot 5-10cm from the floor. A member of the field team connected  
177 one receptor of the CDC-LT to the appropriate terminal of the battery and instructed a household  
178 member on how to connect the second receptor between 18.00 and 19.00 on the installation day.



179 Householders were contacted via mobile phone near this time to ensure that traps were turned  
180 on for the expected duration. The field team returned the next morning to collect the CDC-LTs.

181

### 182 *PKP and MVA Protocols*

183 At the time of recruitment, the internal area of the room where PKP and MVA aspirations were to  
184 be performed was measured. The amount of time spent aspirating each room was calculated  
185 based on this room-specific measurement and an aspiration speed of approximately of 1m<sup>2</sup> per  
186 30 seconds. Two PKP (12V 12 amp) and two MVA (12 V 5 amp) batteries were charged overnight  
187 prior to use the following morning. Aspirations began between 07:00 and 08:00 and continued  
188 until all houses assigned to these collection methods on the day were completed.

189

190 Two field workers were needed to perform PKP and MVA aspirations: one to operate the PKP or  
191 MVA and another to operate a timer and remove objects obstructing the aspiration path.  
192 Aspirations always commenced on the wall immediately to the left of the doorway, on entering  
193 the room, and were continued clockwise around the room. Space below furniture, such as beds  
194 and tables, was also aspirated. In instances where the operator completed all walls before the  
195 allocated time had expired, a second round commenced until the calculated aspiration time was  
196 reached. Walls were aspirated to a height of up to approximately seven feet from the floor or to  
197 the ceiling, whichever was lower. Aspiration occurred left to right across the wall, at a distance of  
198 approximately 1cm from the surface, and gradually shifted downwards covering the entire area to  
199 the bottom of the wall. Contents of collection tubes were observed after aspiration for the  
200 presence of spiders, which if found were killed due to the risk of predation of sand flies.

201

### 202 *Post-Collection Storage, Transport, and Processing*

203 Specimens from all three collection methods were transported in holding containers placed in  
204 insulated coolers, containing ice packs, to RMRIMS. Due to the limited number of capture bags  
205 available for the MVAs, and collection containers for the PKP, aspirations were transferred to  
206 universal tubes fitted with fine mesh and secured by a screw cap with a hole in it for transfer of  
207 specimens using a small, handheld battery-operated aspirator. Holes were plugged with moist  
208 cotton wool to retain humidity and were secured with autoclave tape immediately after transfer for  
209 transport and storage. Universal tubes and CDC-LT collection pots were all stored at -20°C to  
210 freeze kill specimens prior to processing. Tubes and collection pots were labelled with the date of  
211 collection and a unique household number that also conferred geographic (district and village)  
212 information.

213

214 Collections were sorted via microscopy. Sand flies were separated from other collected  
215 arthropods and enumerated by sex and physiological status. Female and male sand flies were

216 placed in separate microcentrifuge tubes containing RNALater™ with a maximum of 25 sand flies  
217 per tube. Specimens were stored in cryoboxes at -20°C.

218

### 219 *Data Collection and Analysis*

220 Data for each collection event (date of collection, district, village, sex and physiological state of  
221 sand flies) were recorded in a Microsoft Excel database. Descriptive statistics included analysis  
222 of total sand fly and total female mosquito data by collection method, district and village. The  
223 number of female *P. argentipes* per collection was modelled using negative binomial regression,  
224 with independent and identically distributed random effects to account for clustering induced by  
225 multiple collections per household. Data for the fourth round of collections were excluded from  
226 statistical analyses since specimens were lost during storage and species data were not  
227 obtainable. The proportion of human blood-fed females out of all female *P. argentipes* caught  
228 was compared between collection methods using logistic regression, also accounting for  
229 household clustering. All statistical analyses were performed using R (version 3.6.3 (2020-02-  
230 29)).

231

### 232 **Molecular Analyses**

#### 233 *DNA Extraction*

234 DNA was extracted from all female sand flies using the Qiagen DNeasy Blood and Tissue Kit per  
235 manufacturer's protocol. DNA samples were stored at -20°C. Molecular analyses were performed  
236 to confirm microscopic species identification of *P. argentipes*, for human DNA detection and *L.*  
237 *donovani* DNA detection in *P. argentipes* females.

238

#### 239 *Species Identification via PCR*

240 All female sand flies were identified using a PCR-RFLP protocol targeting the 18S rRNA coding  
241 genes for phlebotomine sandflies (22), which was adapted as described below. To differentiate  
242 *P. argentipes* from *P. papatasi*, and members of the *Sergentomyia babu* complex, PCR products  
243 underwent restriction enzyme digestion using *Hinfl* and *HpaII* separately for one hour at 37°C.  
244 The total volume per reaction was 25µl, which include 12.5µl of Taq PCR master mix (Qiagen),  
245 1.25 µl for each 10pmol/ µl primer (Forward 18S primer: 5'-TAGTGAAACCGCAAAGGCTCAG-  
246 3'; Reverse 18S primer: 5'-CTCGGATGTGAGTCCTGTATT GT-3') and 10 µl of DNA sample.  
247 Digested products were run on a 2% agarose gel followed by ethidium bromide staining to detect  
248 bands of appropriate sizes corresponding to the three sandfly species.

249

#### 250 *Human DNA analysis*

251 Female sand flies identified as *P. argentipes* by PCR-RFLP were analysed for the presence of  
252 human DNA using a qPCR protocol with primers targeting the cytochrome b (cytb) gene as

253 described previously (23). Quantitative detection of human DNA was performed on an Applied  
254 Biosystems 7500 Fast Real-Time PCR System according to the KAPA SYBR® FAST Universal  
255 Master Mix recommended protocol. For standard curves, human DNA obtained from purchased  
256 donor blood (Cambridge Bioscience) was serially diluted to provide a range of 1- 0.0001ng/µl.  
257 DNA free water was used as No Template Control (NTC) in each assay. A total of 5µl of DNA  
258 was used from each female *P. argentipes*. Samples were considered positive if Ct values were  
259 lower than the lower limit of detection of the assay (Ct< 30). All samples and controls were run in  
260 duplicate.

261

#### 262 *Leishmania donovani* DNA analysis

263 Female sand flies identified as *P. argentipes* by PCR-RFLP were analysed for the presence of *L.*  
264 *donovani* DNA using a qPCR protocol with Taqman primers and probes as previously described  
265 and validated (24, 25). Quantitative detection of *Leishmania* DNA was performed on an Applied  
266 Biosystems 7500 Fast Real-Time PCR System using the conditions recommended by the KAPA  
267 Probe® FAST Universal kit protocol. For standard curves, *L. donovani* DNA from the reference  
268 strain DD8 was serially diluted to provide a range of 1-10<sup>-5</sup> ng/µl. DNA from non-infected and  
269 experimentally infected sand flies from the LSHTM colony was used as negative and positive  
270 control, respectively. DNA free water was used as NTC in each assay. A total of 10µl of DNA was  
271 used from each female *P. argentipes*. Samples were considered positive if Ct values were lower  
272 than the limit of detection of the assay (Ct< 31). All samples and controls were run in duplicate.

273

#### 274 *Simulation of Leishmania donovani* RNA degradation

275 In order to simulate the conditions that infective sand flies may experience during collections,  
276 sand flies were experimentally infected with *L. donovani* at high infection rates of 3x10<sup>6</sup>  
277 amastigotes/ml heat-inactivated human blood through a chick skin (equivalent to 3000  
278 amastigotes/sandfly) and maintained at 28 °C, 80% relative humidity on 10% (w/v) sucrose for 8  
279 days to allow the parasites to colonise the anterior midgut and produce metacyclic promastigotes,  
280 the infectious forms. Sand flies were then killed and kept at different treatment groups simulating  
281 the conditions they would experience either during aspiration or collection by a CDC-LT and prior  
282 to transportation to the laboratory for RNA extraction and analysis using *Leishmania*-specific  
283 ssrRNA primers.

284

285 The four treatment groups considered relevant for aspirations, where sandflies are placed in a  
286 cool bag shortly after collection at ambient temperatures of up to 40°C and then transported to  
287 the laboratory, were RNA extraction at: T0 (immediately after killing), T1 (after 30 mins, kept at  
288 40°C), T2 (after 3 h, kept in a cool bag) and T3 (after 7 h, kept in a cool bag). For CDC-LTs, where  
289 sandflies are collected overnight prior to transportation to the laboratory, T1 was revised to after

290 13-16 h, kept at 40°C, as a ‘worst case scenario’ for possible RNA degradation, and this treatment  
291 was repeated using sand flies infected with a low rate considered to be more representative to  
292 field conditions (equivalent to <100 amastigotes/sandfly).

293

## 294 **Operational considerations**

### 295 *Time burden of sampling*

296 To assess logistical constraints when using CDC-LT, MVA or PKP in a field setting, 24 additional  
297 trap-nights were attempted (8 per method) in a supplement study performed in the Saran villages  
298 in February 2019. The total time burden required to carry out collections for each method was  
299 recorded to the nearest minute for each household. For CDC-LTs, this was measured as the  
300 installation time burden. Additionally, the total time required to sort the samples in each collection  
301 pot according to the protocols implemented during the trapping comparison study was recorded  
302 to the nearest second.

303

### 304 *Householder acceptance*

305 To understand acceptance of and preferences for the three collections methods, all 48  
306 households were surveyed to determine their preferred collection method, the rationale for their  
307 choice, and other considerations for the three methods. The investigators asked householders  
308 the following questions:

- 309 1. Do you prefer collections performed by: CDC light traps, mechanical vacuum  
310 aspirators, Prokopack aspirators or have no preference?
- 311 2. What is your reason for the answer given to question 1?
- 312 3. Do you have any additional comments/complaints relating to any of the collection  
313 methods?

314

315

## 316 **Results**

317

### 318 **CMC descriptive analysis of global data set**

#### 319 *Collection site*

320 Of a total of 576 attempted individual collection events, 562 (97.7%) were completed successfully.  
321 Battery failure (for CDC-LTs left overnight) and inability to enter a household were the main  
322 reasons for unsuccessful collection events. Failures occurred across the four study villages, with  
323 one household having two failed collection events. A total of 6,809 sand flies were collected over  
324 the study period. At least one sand fly was collected from each household with an outlier of 396  
325 total sand flies reported from one household in Ruchunpura (Nalanda) over the study period. Over  
326 82% of collection events yielded at least one sand fly (465/562).

327

328 Fig 2 shows the number of specimens by collection site. Almost half of the sand flies collected  
329 were female (49.0%, n=3,339). Of 3,232 female sand flies identified to species by PCR, 1,934  
330 (59.8%) were *P. argentipes*. *Sergentomyia babu* accounted for 37.0% (n=1,195) of females, and  
331 *P. papatasi* accounted for 3.2% (n=103). The remaining 107 samples were unable to be identified  
332 to species. Although the proportion of total female sand flies collected in the two districts was  
333 roughly equal, the species composition differed. More *P. argentipes* females (n = 1,024, 52.9%  
334 versus n = 910, 47.1%) and *P. papatasi* females (n = 102, 99.0% versus n = 1, 1.0%) were  
335 collected in Saran than in Nalanda, respectively. Most of the *P. papatasi* females were collected  
336 from Rampur Jagdish (n = 95, 92.2%). Of 21,735 mosquitoes collected, 8,174 (37.6%) were  
337 female. Conversely, more mosquito females were collected in Nalanda (n = 5,728, 70.1%) than  
338 in Saran (n = 2,446, 29.9%).

339

340 **Fig 2:** Specimens collected by sex and collection location over the study period. (A) displays sand  
341 fly data, (B) displays mosquito data.

342

343

#### 344 *Collection method*

345 The total numbers of specimens by collection method for all four rounds is given in supplementary  
346 table S1. Fig 3 shows the mean number of sandflies collected by district, village and by collection  
347 method. CDC-LTs collected the highest mean number of sandflies compared to MVA and PKP in  
348 both districts. CDC-LTs accounted for 57.5% of total sand flies collected, followed by PKP and  
349 MVA with 22.4% and 20.1%, respectively.

350

351

352 **Fig 3:** Mean female sand flies collected by method and village. Error bars indicate the 95%  
353 confidence interval of the mean.

354

355

356 Fig 4 shows the mean number of female mosquitoes collected by district, village and by collection  
357 method. Bishambharpur had the lowest mean number of mosquitoes for all three collection  
358 methods. Collections in Dharampur using CDC-LTs had the highest overall mean female  
359 mosquitoes by village and method (32.5). The overall mean number of female mosquitoes per  
360 collection event was 14.5; CDC-LT yielded the greatest mean per collection event (16.96) while  
361 PKP yielded the lowest (10.0).

362

363 **Fig 4:** Mean female mosquitoes collected by method and village. Error bars indicate the 95%  
364 confidence interval of the mean.

365

366

367 Further descriptive and regression analyses focused on *P. argentipes* females in the sand fly  
368 collections and were limited to the first three collection rounds due to post-collection loss of sand  
369 fly specimens from round four.

370

#### 371 **Statistical analyses for rounds 1-3 of CMC**

372 The total numbers of specimens by round and village, and by collection method, for the first three  
373 rounds of collections are given in supplementary tables S2 and S3, respectively. Sampling round  
374 2 yielded the highest mean for total sand flies, male sand flies, and female sand flies, with mean  
375 collections double those of round 1. Round 3 yielded the highest mean *P. argentipes* (Fig 5), with  
376 almost 2.5 times the collection of round 1, but the total mean sand flies collected was lower in  
377 round 3 than for round 2 for both males and females.

378

379 **Fig 5:** Box plots showing the number of *P. argentipes* females/collection event by method of  
380 collection. Medians indicated by horizontal line (at 0 for MVA and PKP) and outliers by black dots.

381

382

383 Logistic regression analysis comparing detection (presence) of sand flies, female sand flies, and  
384 female *P. argentipes* showed CDC-LTs were significantly different from both MVA and PKP with  
385 increased odds of detection from CDC-LT collection events ( $p < 0.0001$ ). Of 511 collection events  
386 (excluding missing data), 75.6% (124/164) CDC-LTs collections resulted in the capture of at least  
387 one female *P. argentipes* compared to 43.2% (76/176) for MVA and 56.2% for PKP (87/171). Fig  
388 6 shows the density of female *P. argentipes* by collection method. CDC-LTs captured the highest  
389 density of female *P. argentipes* per trap-night compared with MVA or PKP. However, the greatest  
390 number of female *P. argentipes* from a single collection event ( $n=63$ ) was collected by PKP. After  
391 adjusting for household clustering, CDC-LTs collected 3.41 times more female sand flies, 4.04  
392 times more *P. argentipes*, and 8.23 more male sand flies than MVA ( $p < 0.0001$  for each). CDC-  
393 LTs also collected 3.08 times more female sand flies, 3.62 times more *P. argentipes*, and 7.21  
394 more male sand flies than PKP ( $p < 0.0001$  for each) (Table 1). PKP collected significantly more  
395 female mosquitoes than MVA ( $p = 0.0002$ ), but there were no significant differences between  
396 CDC-LTs and PKP or MVA.

397

398 **Fig 6:** Mean sand flies collected per trap-night by collection round for the first three collection  
399 rounds (with 95% CI).

400

401 **Table 1:** Number of female sand flies, male sand flies, *P. argentipes* females, and female  
 402 mosquitoes by collection method including IRR and negative binomial regression analyses.

|                              |     | <b>N</b> | <b>IRR (95% CI)</b>   | <b>Z</b> | <b>P-value</b> |
|------------------------------|-----|----------|-----------------------|----------|----------------|
| Total Female Sand Flies      | MVA | 685      | 0.293 (0.215 – 0.401) | -7.70    | <0.0001        |
|                              | PKP | 745      | 0.325 (0.238 – 0.442) | -7.13    | <0.0001        |
|                              | CDC | 1441     | 1                     | -        | -              |
| <i>P. argentipes</i> Females | MVA | 426      | 0.247 (0.161 – 0.380) | -6.39    | <0.0001        |
|                              | PKP | 468      | 0.276 (0.181 – 0.421) | 0.51     | <0.0001        |
|                              | CDC | 726      | 1                     | -        | -              |
| Male Sand Flies              | MVA | 371      | 0.121 (0.086 – 0.171) | -12.13   | <0.0001        |
|                              | PKP | 435      | 0.138 (0.099 – 0.194) | -11.46   | <0.0001        |
|                              | CDC | 2019     | 1                     | -        | -              |
| Female Mosquitoes            | MVA | 2097     | 1.22 (0.915 – 1.648)  | 1.37     | 0.172          |
|                              | PKP | 1440     | 0.791 (0.595 – 1.053) | -1.60    | 0.109          |
|                              | CDC | 1843     | 1                     | -        | -              |

403

404

405

## 406 **Molecular Analyses**

### 407 *Detection of human and Leishmania donovani DNA*

408 Of 1,934 female *P. argentipes*, 1,932 were analysed for the presence of a human DNA derived  
 409 from a bloodmeal, and 156 (8.1%) were positive. Almost 75% of *P. argentipes* with human DNA  
 410 were collected from the two Saran villages. As a proportion of total female *P. argentipes* caught,  
 411 MVA collected significantly more female sand flies with human DNA compared with CDC-LTs and  
 412 PKP (12.97% versus 5.65% and 7.40%, respectively, p-value<0.003).

413

414 Of 1,934 *P. argentipes* analysed for the presence of *L. donovani* DNA, none were positive.

415

### 416 *Simulation of Leishmania donovani RNA degradation*

417 When the infection rate was low there was an increase in the number of cycles for amplification  
 418 (Fig 7). However, even with low infection rates, most samples were amplified before 30 cycles

419 indicating good sensitivity. For the 'worst case scenario', simulating CDC-LT samples where sand  
420 flies were collected overnight for 16h at 40°C and left in a cool bag for 7 hours, *L. donovani* RNA  
421 was detected in sand flies with results comparable with conditions simulating aspirator collections.

422

423 **Fig 7:** Amplification curves for *Leishmania donovani* in sand flies at (A) high (3000  
424 amastigotes/sandfly) or (B) low (<100 amastigotes/sandfly) infection rates maintained under  
425 simulated conditions for aspirator (blue) or CDC collections (yellow) and kept in a cool bag for 7  
426 hours.

427

428

## 429 **Operational considerations**

### 430 *Time burden of sampling*

431 On average, CDC-LTs took less time to install and to collect (6.29 mins) than the time taken to  
432 perform aspirations when using either MVA or PKP by 10.14 and 12.85 mins, respectively. The  
433 time taken to sort samples was influenced by the amount of material and number of target and  
434 non-target specimens within the collections. Although the mean time taken to sort CDC-LT  
435 collections (12.50 mins) was longer than for collections obtained using MVA or PKP by 1.29 and  
436 7.19 mins, respectively, they also contained the highest number of female sand flies (n=3), male  
437 sand flies (n=6) and female mosquitoes (n=157) than MVA (n=0,1,92) or PKP (n=1,0,3),  
438 respectively. Therefore, proportionally, the time invested in sorting compensated for the yield  
439 obtained.

440

### 441 *Householder acceptance*

442 Responses were received from all 48 householders who took part in the study. Amongst the  
443 respondents, 36 (75%) indicated they had a preference for CDC-LTs, 6 (13%) for MVA, 2 (4%)  
444 for PKP/MVA, and 4 (8%) had no preference. No householder indicated they had a preference  
445 solely for PKP collections. The most common reason given for a preference for CDC-LTs was the  
446 perception that fewer mosquitoes were present in their household following sampling. However,  
447 it is interesting to note that amongst householders who indicated a preference for either MVA or  
448 MVA/PKP, the most common explanation was also a perception that there were fewer mosquitoes  
449 present in the household after sampling. Three householders indicated that they felt CDC-LTs  
450 were the easiest collection technique, one considered it to be a less disruptive method, and two  
451 were unable to justify their choice. One respondent preferred MVA collections because they felt  
452 they had insufficient space in their home for a CDC-LT to be installed. When prompted for  
453 additional comments or complaints about the collection techniques, five householders responded  
454 that they found CDC-LTs to be too noisy at night and this caused disruption to their cattle. No  
455 further comments or complaints were received for either the PKP or MVA.



456

## 457 **Discussion**

458 This is the first comprehensive field study that has made a direct comparison between CDC-LTs  
459 and two types of large battery-powered aspirators used in mosquito surveillance for the capture  
460 of *P. argentipes* females. Traditionally, CDC-LTs and mouth aspirators, rather than large battery-  
461 powered aspirators, are used in field studies performed in India to capture *P. argentipes* females  
462 (11, 17, 21, 26). However, a decision was made to avoid using mouth aspirators in the present  
463 study due to health and scientific concerns. Firstly, even if mouth aspirators are equipped with  
464 filters, the potential risk to the field team when making repeated aspirations over a long period of  
465 time, inevitably involving ingestion of small particles of organic debris while gently sucking sand  
466 flies from walls in a tube, was considered too high. Secondly, the degree of potential bias in  
467 efficiency between and amongst collectors, as well as problems relating to standardisation of the  
468 technique, was inappropriate for comparing collection methods. Instead, two different battery-  
469 powered aspirators were compared using a standard operating procedure that was developed for  
470 the study.

471

### 472 **Collection Method Comparison Study**

473 As expected, capture rates were highly variable given they are affected by several factors,  
474 including site, seasonality and climatic variables, which highlights the importance for testing the  
475 different collection methods at the same sites and within the same timeframe, and reducing  
476 sampling bias by using a Latin Square design, as performed in the present study. It is possible  
477 that capture rates using either type of aspirator may have been higher if collections were  
478 performed at an earlier or later time of the day than the time window of 07.00 to 14.00 selected in  
479 the present study which was consistent with working hours of operational field teams rather than  
480 those that may be ideal for research purposes.

481

482 Nevertheless, it is worth noting that the mean capture rates of *P. argentipes* females/trap night  
483 using CDC-LTs placed in human dwellings, of 4.2-4.8 or 6.0-6.1 *P. argentipes* females/trap night  
484 in Nalanda and Saran villages, respectively, were consistent with a mean capture rate of 5.5 *P.*  
485 *argentipes* females/trap night found in a previous study performed in Saran, but higher than the  
486 mean capture rate of 2.0 *P. argentipes* females/trap night reported in Muzaffarpur, Bihar, another  
487 VL endemic district bordering Saran (11, 21) and in other sentinel sites in India where, even during  
488 the June-September peak, densities of *P. argentipes* females/trap night declined from 2014-2019  
489 (27).

490

491 A complete data set, comprising speciation of *P. argentipes*, human DNA detection and *L.*  
492 *donovani* DNA detection, was available for three rounds (three 12x12 Latin squares) of collections  
493 (n=144 collection events/method), rather than for all four rounds performed, and these data were  
494 used in statistical analyses. Significant differences between collection methods were detected for  
495 the primary outcome, number of *P. argentipes* females, since the study was still sufficiently  
496 powered to detect a mean difference of between 1.00-1.25 *P. argentipes* females using the data  
497 used to perform the sample size calculation (18, 21). The main finding that CDC-LTs collected  
498 an average of either 4.04 times or 3.62 times more *P. argentipes* females than either of the  
499 battery-powered aspirators, MVA or PKP, respectively, supports their continued use in  
500 entomological surveillance but other factors should be considered as described further below. It  
501 is interesting to note that, for the purposes of integrated vector-borne disease surveillance and  
502 multiplex pathogen screening, there were no significant differences between incidental captures  
503 of female mosquitoes using CDC-LTs compared with PKP or MVA.

504  
505 To determine which human pathogens are circulating within an area, some MX studies use  
506 collection methods that specifically target blood-fed females to screen for infection. For studies  
507 measuring transmission, when it is important to maximise the likelihood of obtaining vectors  
508 infected with the human infectious stage of the parasite, then collection methods that target gravid  
509 vectors are used. Methods that target host-seeking females, such as CDC-LTs, capture unfed  
510 females which may be nulliparous (never blood-fed so will not be infected unless the pathogen is  
511 transovarially/transstadially transmitted) or parous (previously blood-fed, has laid eggs and  
512 seeking next bloodmeal so may also be infected/infectious). Some research groups include parity  
513 as an entomological outcome in their studies, but parity was not examined in the present study  
514 because it is time consuming, can be misclassified according to expertise, and is unlikely to be  
515 incorporated routinely in programmatic use.

516  
517 **Molecular analyses**  
518 Even though CDC-LTs collected proportionally less *P. argentipes* females with human DNA than  
519 MVA, there was no significant difference in the absolute number of *P. argentipes* females with  
520 human DNA captured. In the present study, the mean rate of human DNA detected in *P.*  
521 *argentipes* females for all three collection methods was 8.1% with a mean rate of 5.4% for CDC  
522 traps placed inside houses. This rate is slightly higher than previously reported in Saran, where  
523 bloodmeals were detected in 3.2% and 2.6% of *P. argentipes* collected in CDC-LTs placed inside  
524 combined dwellings (where humans and cattle are in close proximity) and houses (with no cattle),  
525 respectively (11). Previously, in Muzaffarpur, the mean percentage of blood-fed *P. argentipes*  
526 captured in CDC-LTs was 30.2% pre-intervention and 2.4% post-intervention with untreated bed  
527 nets (28). Although it is possible that low feeding rates in Saran may be due to IRS intervention,

528 there was no significant difference between the mean numbers of *P. argentipes* collected in  
529 households between Saran (VL endemic) and Nalanda (non-programmatic) villages, and the  
530 mean rate of human DNA detected in *P. argentipes* collected in Saran villages (11.4%) was  
531 significantly higher than for the non-endemic Nalanda villages (4.4%). There are several factors  
532 that may account for the differences, including: house construction (influencing sand fly entry  
533 and/or providing optimal conditions for resting), number of human inhabitants/house, type/number  
534 of livestock (either providing protection or increasing the risk of biting), and implementation of IRS  
535 (excito-repellency effect of synthetic pyrethroids may increase the risk of outdoor biting).

536  
537 Human DNA detected in the sand flies could derive from a bloodmeal taken solely from a human  
538 host, or from a sand fly that had fed on multiple hosts since mixed bloodmeals have been reported  
539 for *P. argentipes* captured previously in Saran where human DNA was detected using *cyt b* PCR  
540 and reverse line blot in 164 of 288 (57%) blood-fed females (13). The same study showed that  
541 the peak time to detect human DNA in *P. argentipes* in Saran villages was June-September which  
542 coincided with the sampling period performed in the present study (13). In Muzaffarpur, the  
543 Human Bloodmeal Index was 81% pre-intervention and 19% post-intervention with untreated bed  
544 nets (28).

545  
546 There are few studies measuring infection rates of *P. argentipes* with *L. donovani* DNA in India.  
547 Previously, CDC-LT collections performed in 2010 in Muzaffarpur showed that infection rates vary  
548 from 0.9% to 2.8% (12/422) according to the season (16). In the present study, no *L. donovani*  
549 DNA was detected in each of the 1,934 sand flies individually tested from collections performed  
550 in 2018 (0/1024 from Saran and 0/910 from Nalanda). The inability to detect *L. donovani* DNA in  
551 *P. argentipes* in the Saran villages is surprising considering that VL and PKDL cases were  
552 reported on the KAMIS system in months leading up to and after when the work was performed.  
553 However, similar low infections rates in *P. argentipes* were also reported in eight VL sentinel sites  
554 undergoing routine entomological and IRS surveillance in three VL endemic States in India (27).  
555 Of 14,775 *P. argentipes* females tested, *L. donovani* DNA was detected in only four females  
556 collected in the district of East Champaran, Bihar (3/991 and 1/704 females collected 2017 and  
557 2018, respectively). No females were positive at any other of the sentinel sites suggesting that  
558 active transmission is low (27). These data provide further evidence to support that efforts  
559 implemented during the accelerated kala-azar control programme may have successfully reduced  
560 the VL burden in endemic blocks.

561  
562 It is important to note that differences in the sensitivity and specificity of the molecular assays  
563 used may affect differences in results. Many assays have been developed with different molecular  
564 targets with a specificity variation between 29.6–100% and sensitivity between 91.3–100% has

565 been reported (25). In addition, most assays used were developed to detect infections in human  
566 patients or dogs, rather than sand flies, and may cross-react with common insect protozoan  
567 parasites of the family Trypanosomatidae (e.g. *Leptomonas*). To avoid false positive or false  
568 negative results, it is important to use assays with targets specific for *L. donovani* and also use  
569 more than one target to confirm results, as performed in this study.

570

571 Also crucial for the purposes of MX, was the finding from the simulation experiment that the higher  
572 yield of *P. argentipes* females in CDC-LTs was unlikely to be compromised by an inability to detect  
573 *Leishmania* RNA in samples since RNA analysis may be required in future studies aiming to  
574 detect the metacyclic infectious stage in sand flies.

575

### 576 **Operational considerations**

577 Firstly, it should be noted that battery procurement and availability can be a limiting factor for all  
578 three methods used. It took a substantial effort to obtain the three different types of recommended  
579 batteries for the collection methods in India, but a supplier for large numbers of 6V 12amp  
580 batteries, as used for CDC-LTs, was later identified. Further evidence in favour for using CDC-  
581 LTs was the lower time burden for collecting specimens than either method of aspiration. This  
582 finding has some major implications for operational teams since it influences how many  
583 households can be sampled in one day: roughly 20 households may be sampled/day using CDC-  
584 LTs (including setting up and collecting traps) for every 9-10 or 10-11 aspirations using PKP or  
585 MVA, respectively. Sorting samples, and accurate recording of data, in the laboratory needs to  
586 be performed with precision and, although it took less time to sort samples collected using PKP  
587 than for the other methods of collection in our supplementary study, they contained less target  
588 material. It should be noted that the supplementary study performed to obtain time estimates took  
589 place in February, when sand fly numbers tend to be lower than June to September when the  
590 CMC study took place (11). However, results of the CMC indicate that although collections using  
591 aspirators will contain less sand flies to process than collections using CDC-LTs, they will have  
592 similar numbers of female mosquitoes during the June to September peak and mosquitoes  
593 outnumber sand flies in the collections.

594

595 Importantly, more householders in the study expressed a preference for CDC-LTs than for the  
596 battery-powered aspirators in contrast to residents in Brazil who preferred MVA over CDC-LTs  
597 due to the nuisance of light and noise in the bedroom at night (8). Continued consent of  
598 householders in India to allow indoor sampling using CDC-LTs in their homes should be  
599 monitored especially in light of some complaints relating to disturbance to animals expressed in  
600 the current study.

601  
602  
603  
604  
605  
606  
607  
608  
609  
610  
611  
612  
613  
614  
615  
616  
617  
618  
619  
620  
621  
622  
623  
624  
625  
626  
627  
628  
629  
630  
631  
632  
633

## **Recommendations**

Based on the evidence obtained, CDC-LTs are the best method for collecting *P. argentipes* females in houses for transmission studies. However, capture rates are still low, and further research is required to increase collections of target species and to improve molecular methods. Specifically, in order to calculate the EIR of *P. argentipes*, a diagnostic test must be developed to identify the metacyclic stage of *L. donovani*. Although a laboratory protocol for detecting *L. mexicana* metacyclics in infected *Lutzomyia longipalpis* sand flies has been published (29), it has not yet been validated in the field nor modified for other *Leishmania*/sand fly models.

Presently, molecular methods used for MX require skilled technical staff and a well-equipped laboratory and the cost of screening large numbers of vectors may be prohibitive for programmatic use thus reducing the role of MX for research purposes only (6). To expand the flexibility of a MX system for programmatic use, and make it more cost-effective, integrating vector-borne disease surveillance should be considered. New multiplex methods for point-of-need use are under development which make the possibility of integrating vector-borne disease surveillance a realistic and cost-effective proposition.

## **Acknowledgements**

The research team would like to thank the following individuals and organizations:

All householders in Nalanda and Saran who permitted access to their homes.

HMSC for providing permission for the study. The National Centre for Vector Borne Disease Control (formerly the Vector Borne Disease Control Programme) for their support and advice in placement of the research.

Field workers and project administration staff who participated in this research.

Dr Tom Walker for advice on molecular tests.

## 635 References

636

- 637 1. Chowdhury R, Kumar V, Mondal D, Das ML, Das P, Dash AP, et al. Implication of vector  
638 characteristics of *Phlebotomus argentipes* in the kala-azar elimination programme in the Indian  
639 sub-continent. *Pathogens and Global Health*. 2016;110(3):87-96.
- 640 2. WHO. Regional strategic framework for elimination of kala-azar from the South-East  
641 Asia region (2005-2015). New Delhi: Regional Office for South-East Asia SEA-VBC-85 (Rev-1).  
642 2005.
- 643 3. Programme NVBDC. Accelerated plan for kala-azar elimination. Delhi, India: NVBDCP;  
644 2017.
- 645 4. WHO. Global leishmaniasis surveillance, 2017–2018, and first report on 5 additional  
646 indicators. 2020. Contract No.: 95.
- 647 5. WHO. Report of Meeting of the Regional Technical Advisory Group (RTAG) on Visceral  
648 Leishmaniasis and the National Visceral Leishmaniasis Programme Managers of endemic  
649 Member States Regional Office for South-East Asia; 2020. 2020.
- 650 6. Cameron MM, Ramesh A. The use of molecular xenomonitoring for surveillance of  
651 mosquito-borne diseases. *Phil Trans R Soc B* 2020;20190816.
- 652 7. Subramanian S, Jambulingam P, Chu BK, Sadanandane C, Vasuki V, Srividya A, et al.  
653 Application of a household-based molecular xenomonitoring strategy to evaluate the lymphatic  
654 filariasis elimination program in Tamil Nadu, India. *Plos Neglected Tropical Diseases*.  
655 2017;11(4).
- 656 8. Ramesh A, Cameron M, Spence K, Spaans RH, Melo-Santos MAV, Paiva MHS, et al.  
657 Development of an urban molecular xenomonitoring system for lymphatic filariasis in the Recife  
658 Metropolitan Region, Brazil. *Plos Neglected Tropical Diseases*. 2018;12(10).
- 659 9. Ramirez AL, van den Hurk AF, Meyer DB, Ritchie SA. Searching for the proverbial  
660 needle in a haystack: advances in mosquito-borne arbovirus surveillance. *Parasit Vectors*.  
661 2018;11(1):320.
- 662 10. Ready PD. Biology of phlebotomine sand flies as vectors of disease agents. *Annual*  
663 *Review of Entomology*. 2013;58:227-50.
- 664 11. Poche D, Garlapati R, Ingenloff K, Remmers J, Poche R. Bionomics of phlebotomine  
665 sand flies from three villages in Bihar, India. *Journal of Vector Ecology*. 2011;36:S106-S17.
- 666 12. Cameron MM, Acosta-Serrano A, Bern C, Boelaert M, den Boer M, Burza S, et al.  
667 Understanding the transmission dynamics of *Leishmania donovani* to provide robust evidence  
668 for interventions to eliminate visceral leishmaniasis in Bihar, India. *Parasites & Vectors*. 2016;9.
- 669 13. Garlapati RB, Abbasi I, Warburg A, Poche DM, Poché RM. Identification of Bloodmeals  
670 in Wild Caught Blood Fed *Phlebotomus argentipes* (Diptera: Psychodidae) Using Cytochrome b  
671 PCR and Reverse Line Blotting in Bihar, India. *Journal of Medical Entomology*. 2012;49(3):515-  
672 21.
- 673 14. Poché DM, Garlapati RB, Mukherjee S, Torres-Poche Z, Hasker E, Rahman T, et al.  
674 Bionomics of *Phlebotomus argentipes* in villages in Bihar, India with insights into efficacy of IRS-  
675 based control measures. *PLoS Negl Trop Dis*. 2018;12(1):e0006168.
- 676 15. Tiwary P, Kumar D, Singh RP, Rai M, Sundar S. Prevalence of Sand Flies and  
677 *Leishmania donovani* Infection in a Natural Population of Female *Phlebotomus argentipes* in  
678 Bihar State, India. *Vector-Borne and Zoonotic Diseases*. 2012;12(6):467-72.
- 679 16. Tiwary P, Kumar D, Mishra M, Singh RP, Rai M, Sundar S. Seasonal Variation in the  
680 Prevalence of Sand Flies Infected with *Leishmania donovani*. *Plos One*. 2013;8(4).
- 681 17. Sardar AA, Chatterjee M, Jana K, Saha P, Maji AK, Guha SK, et al. Seasonal variation  
682 of sand fly populations in Kala-azar endemic areas of the Malda district, West Bengal, India.  
683 *Acta Trop*. 2020;204:105358.
- 684 18. Mondragon-Shem K. Efficacy of CDC light and gravid traps for the collection of sandflies  
685 in Bhubaneswar, Orissa (India). London, UK: London School of Hygiene and Tropical Medicine;  
686 2013.
- 687 19. Vazquez-Prokopec GM, Galvin WA, Kelly R, Kitron U. A new, cost-effective, battery-  
688 powered aspirator for adult mosquito collections. *J Med Entomol*. 2009;46(6):1256-9.

- 689 20. Torres MG, Weakley AM, Hibbert JD, Kirstein OD, Lanzaro GC, Lee Y. Ethanol as a  
690 potential mosquito sample storage medium for RNA preservation. *F1000Res*. 2019;8:1431.
- 691 21. Picado A, Das ML, Kumar V, Kesari S, Dinesh DS, Roy L, et al. Effect of Village-wide  
692 Use of Long-Lasting Insecticidal Nets on Visceral Leishmaniasis Vectors in India and Nepal: A  
693 Cluster Randomized Trial. *Plos Neglected Tropical Diseases*. 2010;4(1).
- 694 22. Tiwary P, Kumar D, Rai M, Sundar S. PCR-RFLP based method for molecular  
695 differentiation of sand fly species *Phlebotomus argentipes*, *Phlebotomus papatasi*, and  
696 *Sergentomyia babu* found in India. *J Med Entomol*. 2012;49(6):1515-8.
- 697 23. Sales KG, Costa PL, de Moraes RC, Otranto D, Brandão-Filho SP, Cavalcanti Mde P, et  
698 al. Identification of phlebotomine sand fly blood meals by real-time PCR. *Parasit Vectors*.  
699 2015;8:230.
- 700 24. Vallur AC, Duthie MS, Reinhart C, Tutterrow Y, Hamano S, Bhaskar KR, et al.  
701 Biomarkers for intracellular pathogens: establishing tools as vaccine and therapeutic endpoints  
702 for visceral leishmaniasis. *Clin Microbiol Infect*. 2014;20(6):O374-83.
- 703 25. Adams ER, Schoone G, Versteeg I, Gomez MA, Diro E, Mori Y, et al. Development and  
704 Evaluation of a Novel Loop-Mediated Isothermal Amplification Assay for Diagnosis of  
705 Cutaneous and Visceral Leishmaniasis. *J Clin Microbiol*. 2018;56(7).
- 706 26. Dinesh DS, Das P, Picado A, Davies C, Speybroeck N, Boelaert M, et al. The efficacy of  
707 indoor CDC light traps for collecting the sandfly *Phlebotomus argentipes*, vector of *Leishmania*  
708 *donovani*. *Med Vet Entomol*. 2008;22(2):120-3.
- 709 27. Deb R, Singh RP, Mishra PK, Hitchins L, Reid E, Barwa AM, et al. Impact of IRS: Four-  
710 years of entomological surveillance of the Indian Visceral Leishmaniasis elimination  
711 programme. *PLOS Neglected Tropical Diseases*. 2021;15(8):e0009101.
- 712 28. Picado A, Kumar V, Das M, Burniston I, Roy L, Suman R, et al. Effect of untreated bed  
713 nets on blood-fed *Phlebotomus argentipes* in kala-azar endemic foci in Nepal and India.  
714 *Memorias Do Instituto Oswaldo Cruz*. 2009;104(8):1183-6.
- 715 29. Giraud E, Martin O, Yakob L, Rogers M. Quantifying *Leishmania* Metacyclic  
716 Promastigotes from Individual Sandfly Bites Reveals the Efficiency of Vector Transmission.  
717 *Communications Biology*. 2019;2(1):84.  
718

719 **CRedit authorship contribution statement**

720

721 **Shannon McIntyre-Nolan:** Conceptualization, Investigation, Methodology, Writing - Original  
722 Draft Preparation, Writing - Review & Editing. **Vijay Kumar:** Project Administration, Resources,  
723 Writing - Review & Editing. **Miguella Mark Carew:** Data Curation, Formal Analysis, Writing -  
724 Original Draft Preparation, Writing - Review & Editing. **Kundan Kumar:** Investigation, Writing -  
725 Review & Editing. **Emily Nightingale:** Formal Analysis, Methodology, Writing - Original Draft  
726 Preparation, Writing - Review & Editing. **Giorgia Dalla Libera Marchiori:** Investigation,  
727 Methodology, Writing - Review & Editing. **Matthew Rogers:** Investigation, Supervision, Writing -  
728 Review & Editing. **Mojca Kristan:** Investigation, Writing - Review & Editing. **Susana Campino:**  
729 Investigation, Supervision, Methodology, Validation, Writing - Original Draft Preparation Writing -  
730 Review & Editing. **Graham F. Medley:** Formal Analysis, Funding Acquisition, Supervision, Writing  
731 - Review & Editing. **Pradeep Das:** Conceptualization, Resources, Supervision, Writing - Review  
732 & Editing. **Mary Cameron:** Conceptualization, Funding Acquisition, Methodology, Project  
733 Administration, Supervision, Writing - Original Draft Preparation, Writing - Review & Editing.

734

735 **Financial Disclosure Statement**

736 This project was kindly supported by the Bill and Melinda Gates Foundation OPP1183986. The  
737 funders had no role in study design, data collection and analysis, decision to publish, or  
738 preparation of the manuscript. The project also received resources, sand fly samples to optimise  
739 the PCR identification protocol, from the European Union's Horizon 2020 research and innovation  
740 programme under grant agreement No 731060 (Infravec2).

741

742 **Declaration of competing interest**

743 The authors declare that they have no competing interests.

744

745 **Informed Consent, Confidentiality, and Ethical Approval**

746 The study was approved by the Ethics committee of the GOI Health Ministry's Screening  
747 Committee (Ref: 2017-4126), RMRIMS (Ref: 39/RMRI/EC/2017) and the London School of  
748 Hygiene & Tropical Medicine (Ref: 1463). Members of each household were provided with an  
749 information sheet in Hindi explaining the purpose of the study, their involvement, and any potential  
750 adverse outcomes prior to commencement of sampling at each site. Information sheets were read  
751 to participants if they identified themselves as illiterate. Participants met with the investigators to  
752 answer any questions about the study. The household head or a nominated proxy provided written  
753 or oral informed consent for recruitment to the study. Signed consent forms and audio consent  
754 recordings were stored securely to protect participant confidentiality.



755 **Supplemental Tables**

756

757 **S1** Specimens collected by collection method for all four rounds of the study.

| Rounds1-4                        | Collection Method |             |             | Total        |
|----------------------------------|-------------------|-------------|-------------|--------------|
|                                  | CDC               | MVA         | PKP         |              |
| <b>Total sand fly females</b>    | 1621 (48.5)       | 810 (24.3)  | 908 (27.0)  | <b>3,339</b> |
| <i>P. argentipes</i> females     | 866 (44.8)        | 501 (25.9)  | 567 (29.3)  | <b>1,934</b> |
| <i>P. papatasi</i> females       | 24 (23.3)         | 47 (45.6)   | 32 (31.1)   | <b>103</b>   |
| <i>Sergentomyia babu</i> females | 704 (58.9)        | 224 (18.7)  | 267 (22.3)  | <b>1195</b>  |
| Other/Unknown females            | 27 (25.2)         | 38 (35.5)   | 42 (39.3)   | <b>107</b>   |
| <b>Total sand fly males</b>      | 2293 (66.1)       | 558 (16.1)  | 619 (17.8)  | <b>3,470</b> |
| <b>Total sand flies</b>          | 3914 (57.5)       | 1368 (20.1) | 1527 (22.4) | <b>6,809</b> |
| <b>Total female mosquitoes</b>   | 3085 (37.7)       | 3193 (39.1) | 1896 (23.2) | <b>8174</b>  |

758

759

760 **S2. Specimens collected by round and village.**

| Collection Round                      | <i>P. argentipes</i> | <i>S. babu</i> | Female Flies | Sand | Female Mosquitoes | Total Flies | Sand |
|---------------------------------------|----------------------|----------------|--------------|------|-------------------|-------------|------|
| <b>Round 1</b><br>(June 25 – July 12) | <b>294</b>           | <b>293</b>     | <b>641</b>   |      | <b>969</b>        | <b>1207</b> |      |
| <i>Bishambharpur</i>                  | 144                  | 76             | 230          |      | 198               | 459         |      |
| <i>Dharampur</i>                      | 77                   | 104            | 196          |      | 186               | 348         |      |
| <i>Rampur Jagdish</i>                 | 41                   | 69             | 131          |      | 451               | 255         |      |
| <i>Rachanpura</i>                     | 32                   | 44             | 84           |      | 134               | 145         |      |
| <b>Round 2</b><br>(July 16 – Aug 2)   | <b>633</b>           | <b>516</b>     | <b>1220</b>  |      | <b>1825</b>       | <b>2528</b> |      |
| <i>Bishambharpur</i>                  | 95                   | 116            | 229          |      | 120               | 580         |      |
| <i>Dharampur</i>                      | 200                  | 154            | 372          |      | 657               | 743         |      |
| <i>Rampur Jagdish</i>                 | 167                  | 85             | 279          |      | 641               | 529         |      |
| <i>Rachanpura</i>                     | 171                  | 161            | 340          |      | 407               | 676         |      |
| <b>Round 3</b><br>(Aug 6 – Aug 24)    | <b>693</b>           | <b>263</b>     | <b>1010</b>  |      | <b>2586</b>       | <b>1961</b> |      |
| <i>Bishambharpur</i>                  | 229                  | 26             | 257          |      | 247               | 644         |      |
| <i>Dharampur</i>                      | 188                  | 87             | 280          |      | 1099              | 462         |      |
| <i>Rampur Jagdish</i>                 | 162                  | 36             | 243          |      | 391               | 442         |      |
| <i>Rachanpura</i>                     | 114                  | 114            | 230          |      | 849               | 413         |      |
| <b>Total</b>                          | <b>1620</b>          | <b>1072</b>    | <b>2871</b>  |      | <b>5380</b>       | <b>5696</b> |      |

761

762

763 **S3.** Numbers and percentages of sandflies and mosquitoes collected by species, sex, and  
 764 collection method during the first three collection rounds used in logistic regression analysis.

| Rounds 1-3                       | Collection Method |             |             | Total       |
|----------------------------------|-------------------|-------------|-------------|-------------|
|                                  | CDC-LT            | MVA         | PKP         |             |
| <b>Total sand fly females</b>    | 1441 (50.2)       | 685 (23.9)  | 745 (25.9)  | <b>2871</b> |
| <i>P. argentipes</i> females     | 726 (44.8)        | 426 (26.3)  | 468 (28.9)  | <b>1620</b> |
| <i>P. papatasi</i> females       | 24 (28.2)         | 34 (40.0)   | 85 (31.8)   | <b>85</b>   |
| <i>Sergentomyia babu</i> females | 664 (61.9)        | 187 (17.4)  | 221 (20.6)  | <b>1072</b> |
| Other/Unknown females            | 27 (28.7)         | 38 (40.4)   | 29 (30.9)   | <b>94</b>   |
| <b>Total sand fly males</b>      | 2019 (71.5)       | 371 (13.1)  | 435 (15.4)  | <b>2825</b> |
| <b>Total sand flies</b>          | 3460 (60.7)       | 1056 (18.5) | 1180 (20.7) | <b>5696</b> |
| <b>Total female mosquitoes</b>   | 1843 (34.3)       | 2097 (39.0) | 1140 (26.8) | <b>5380</b> |

765

766

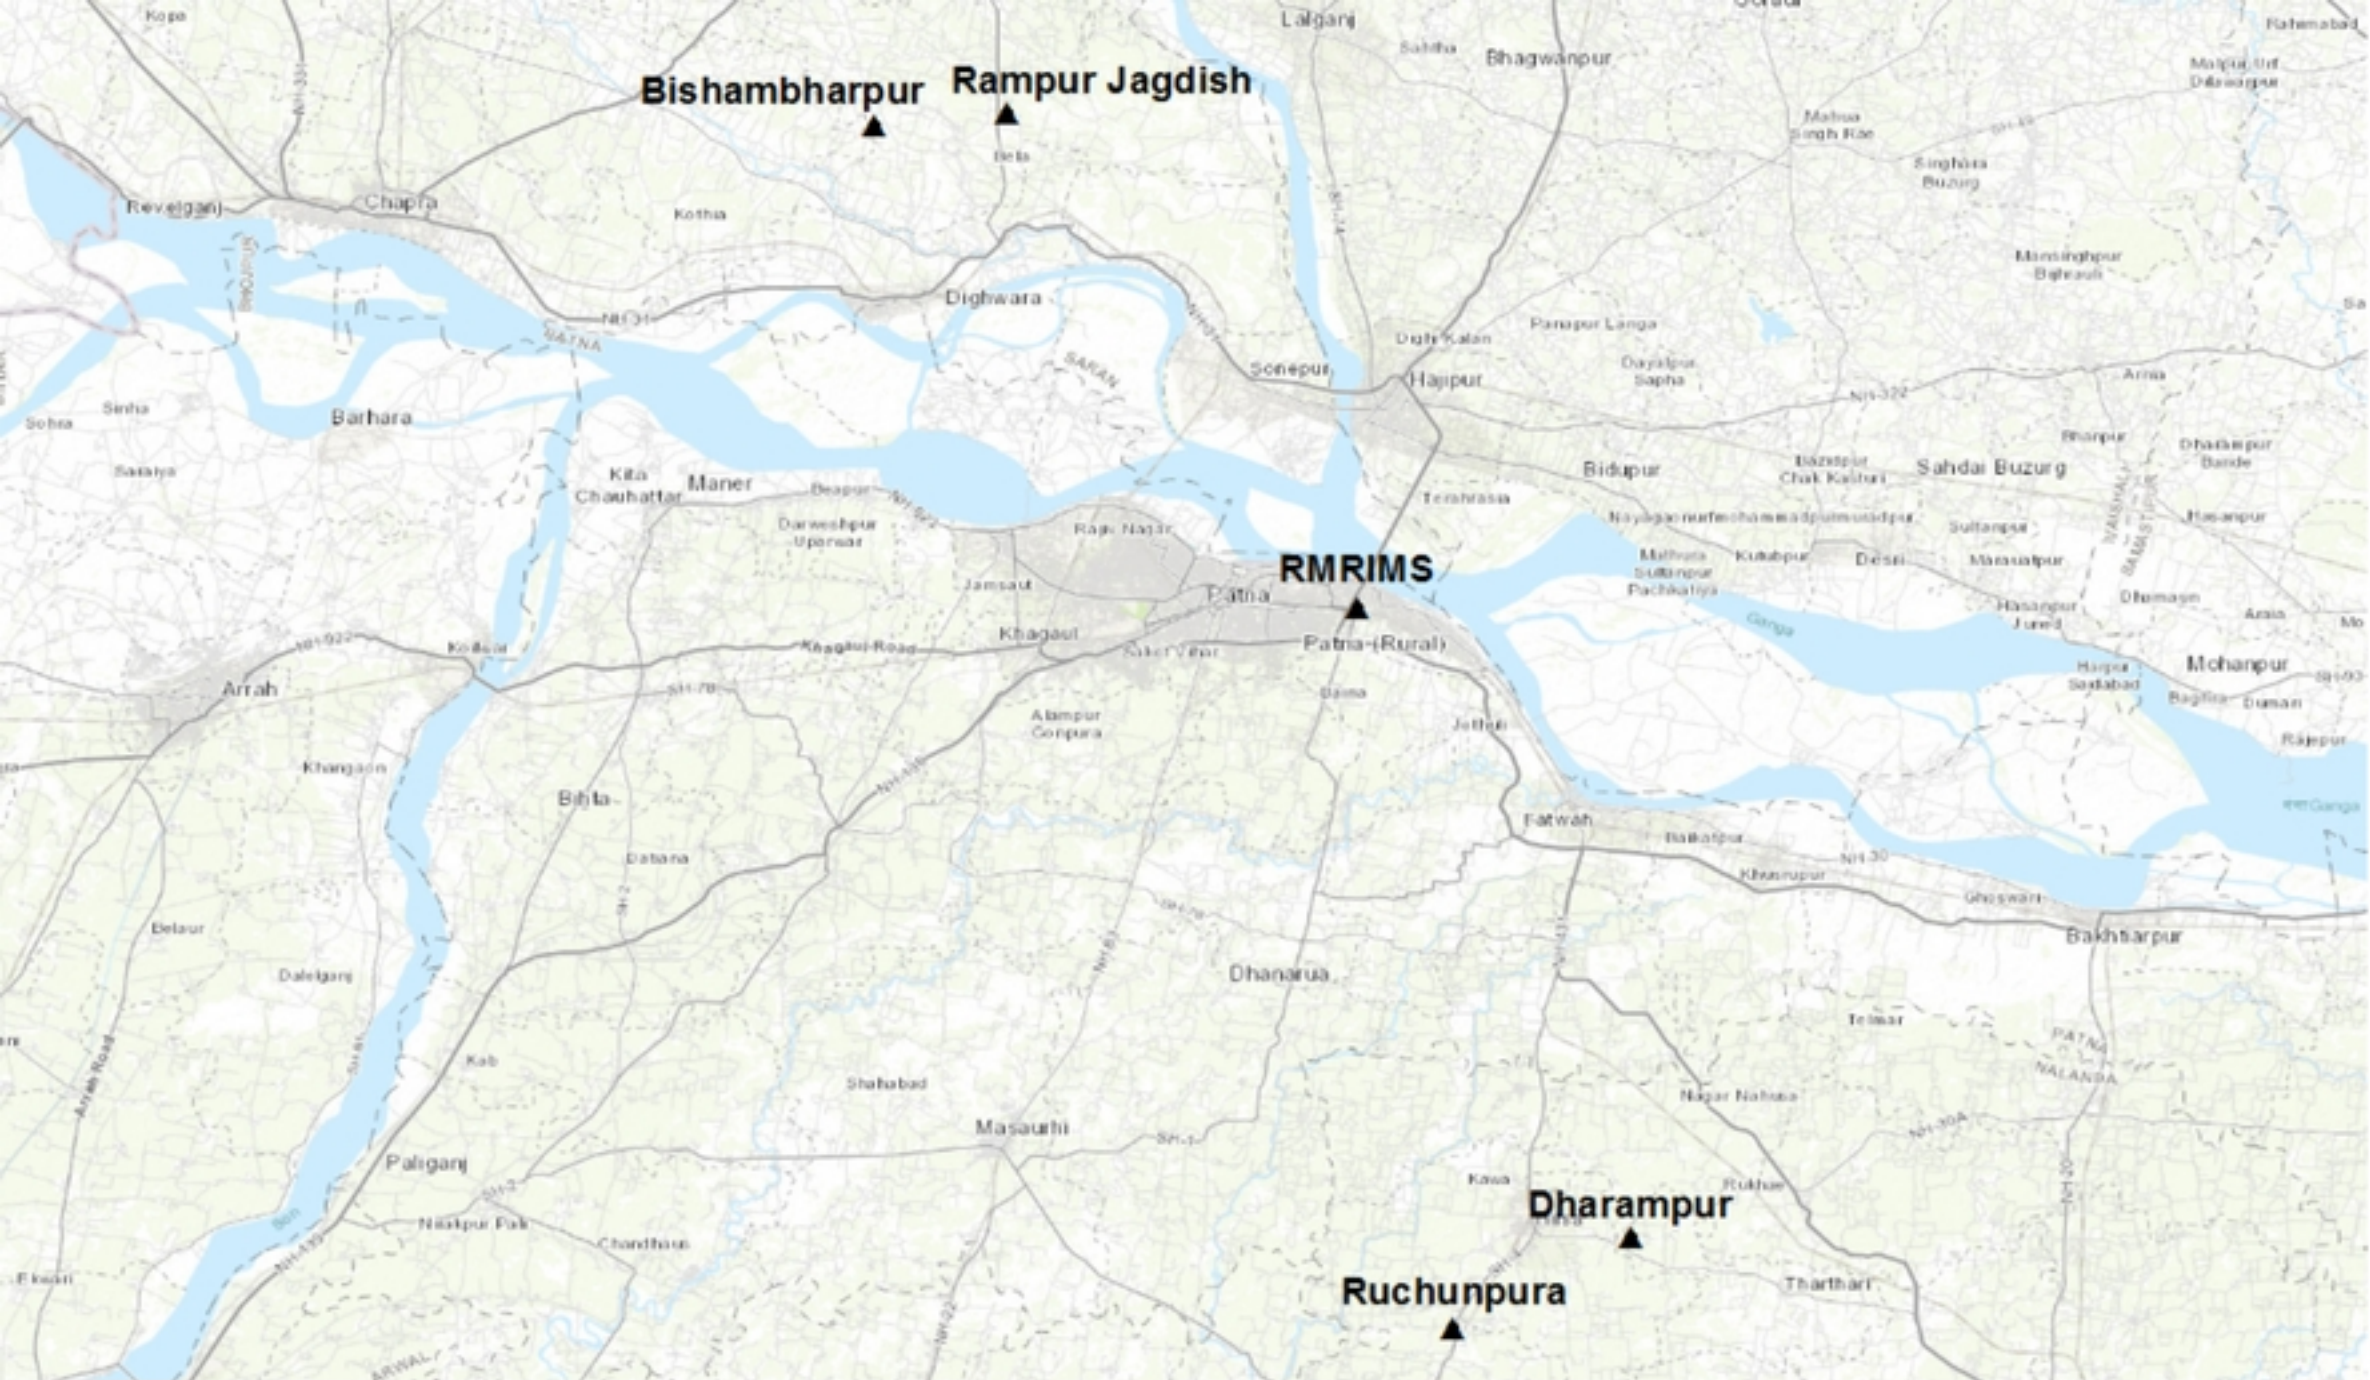

Figure 1

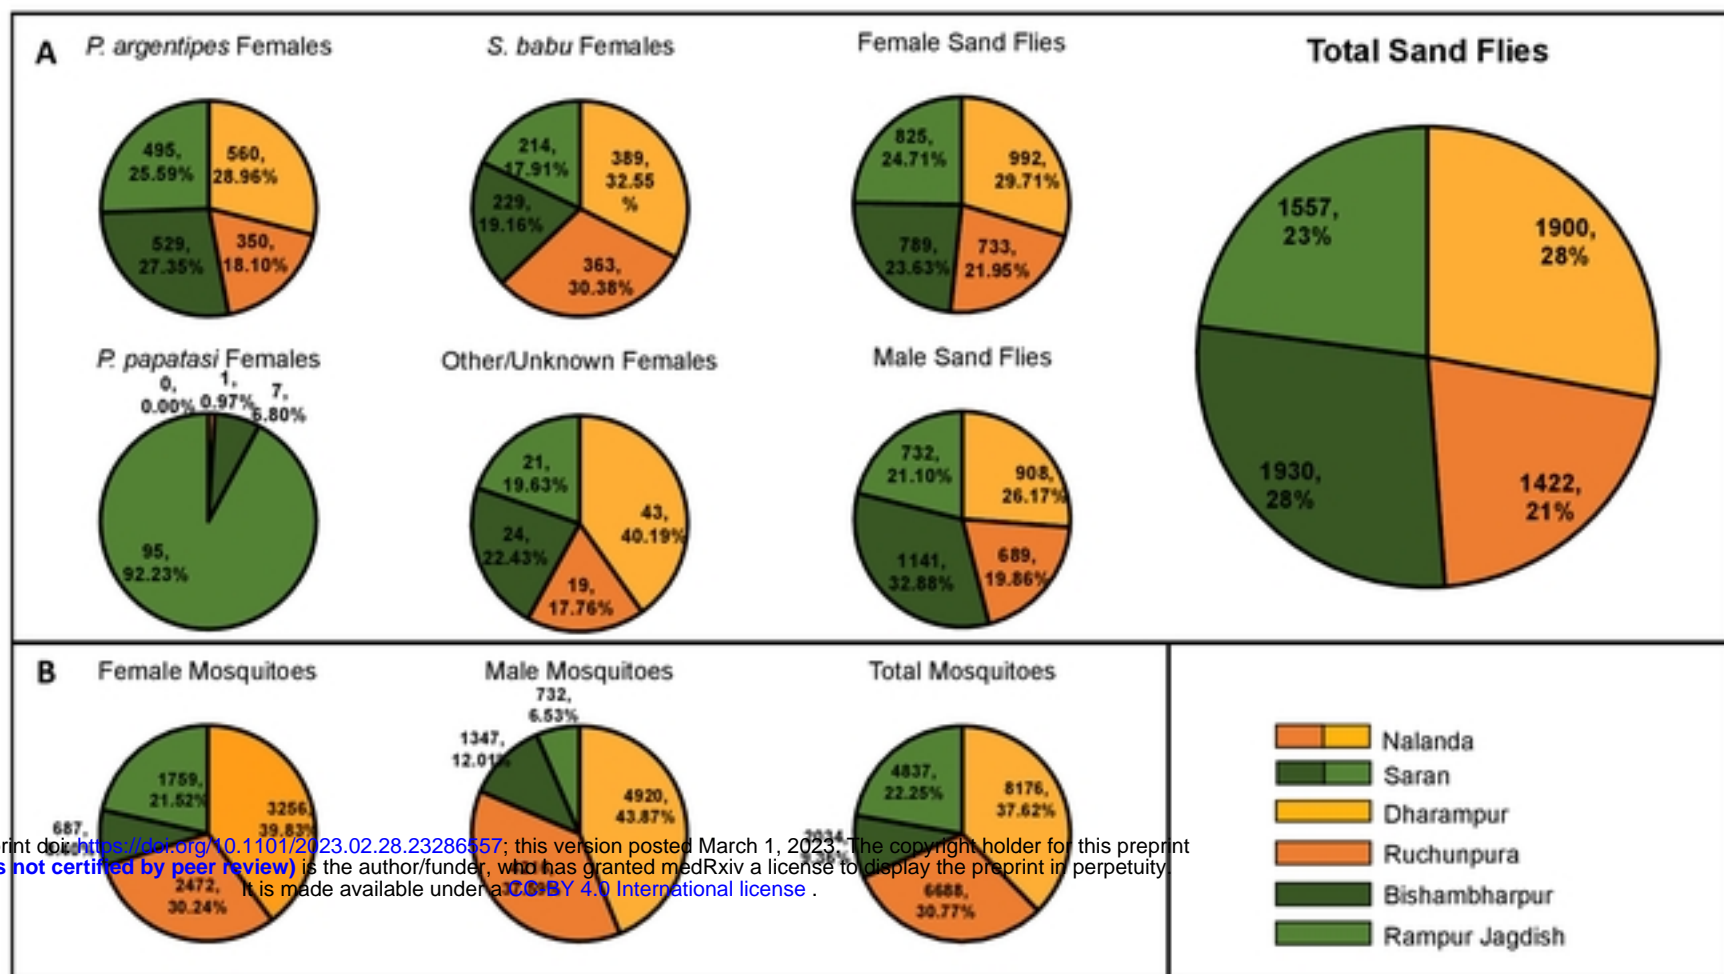

Figure 2

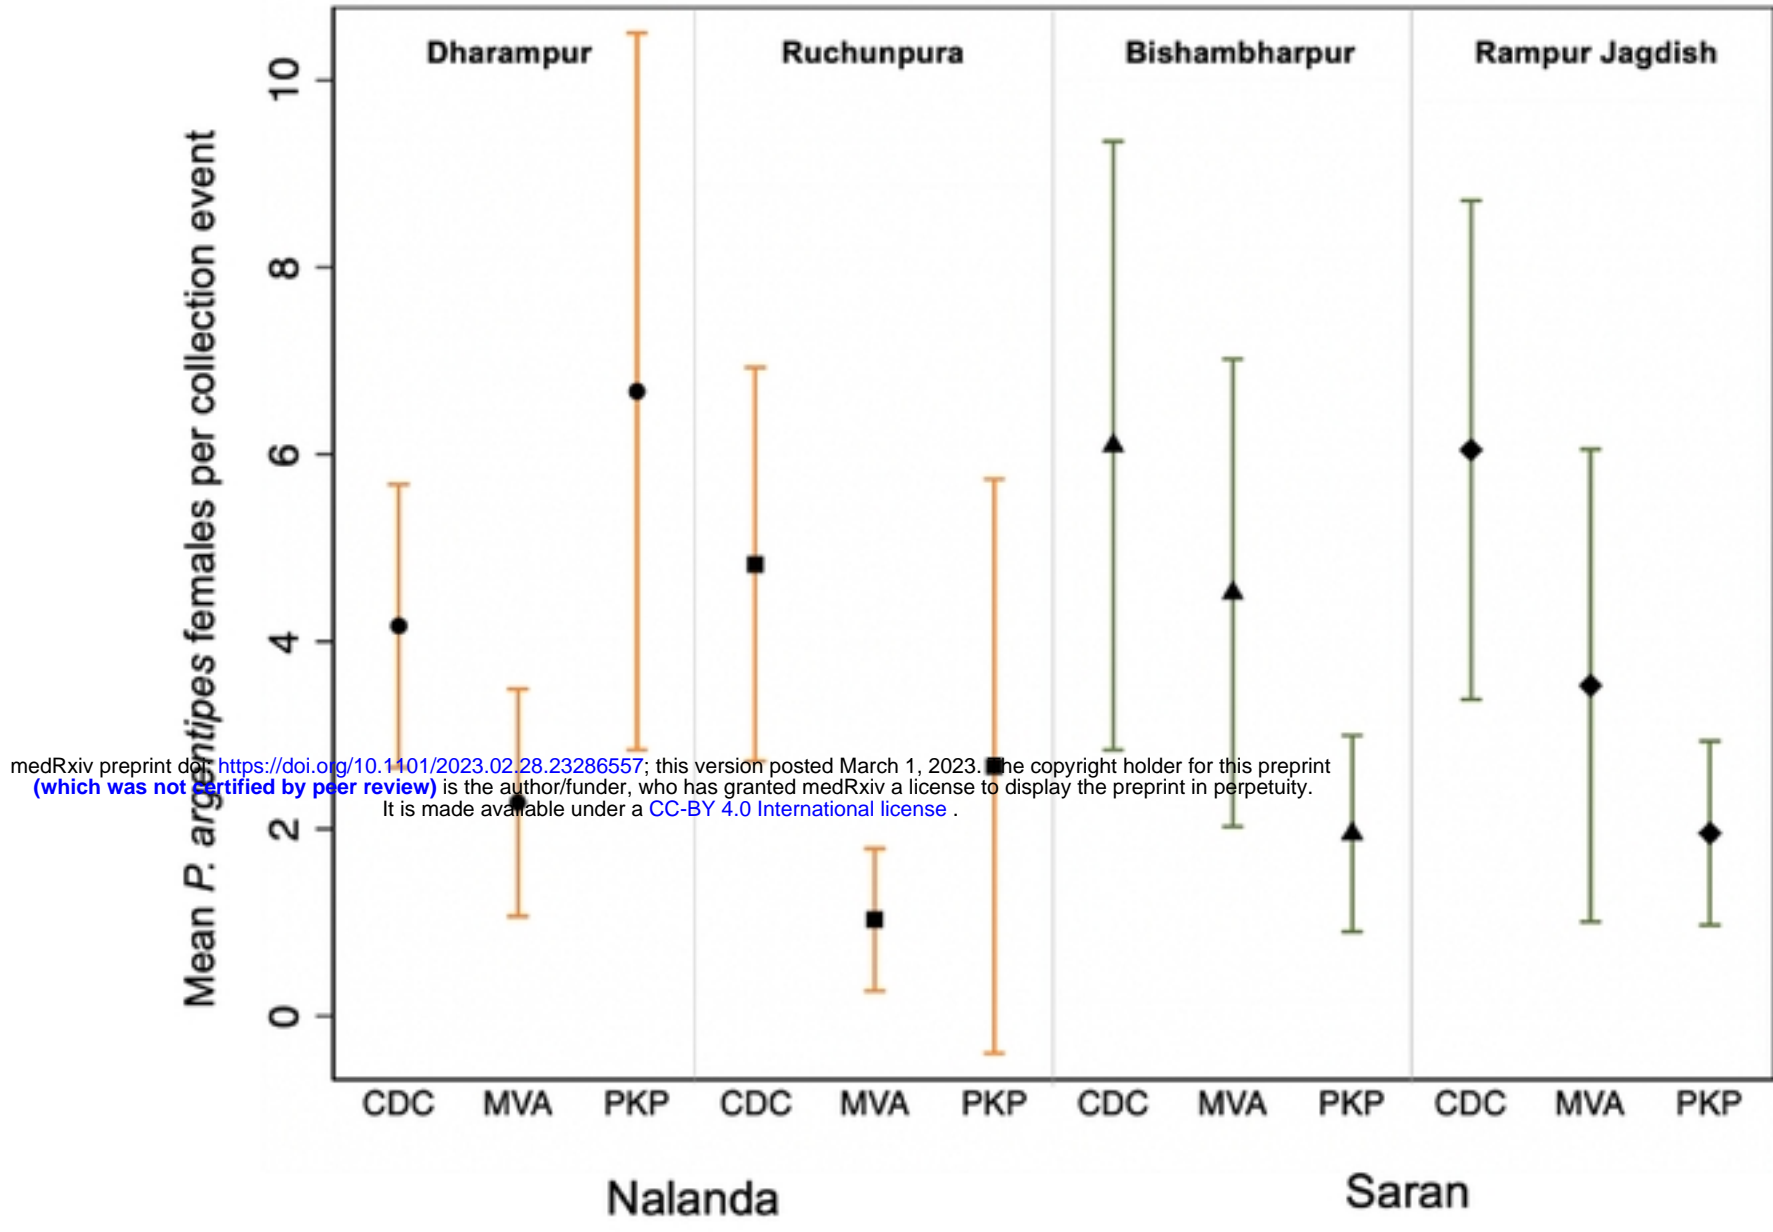

Figure 3

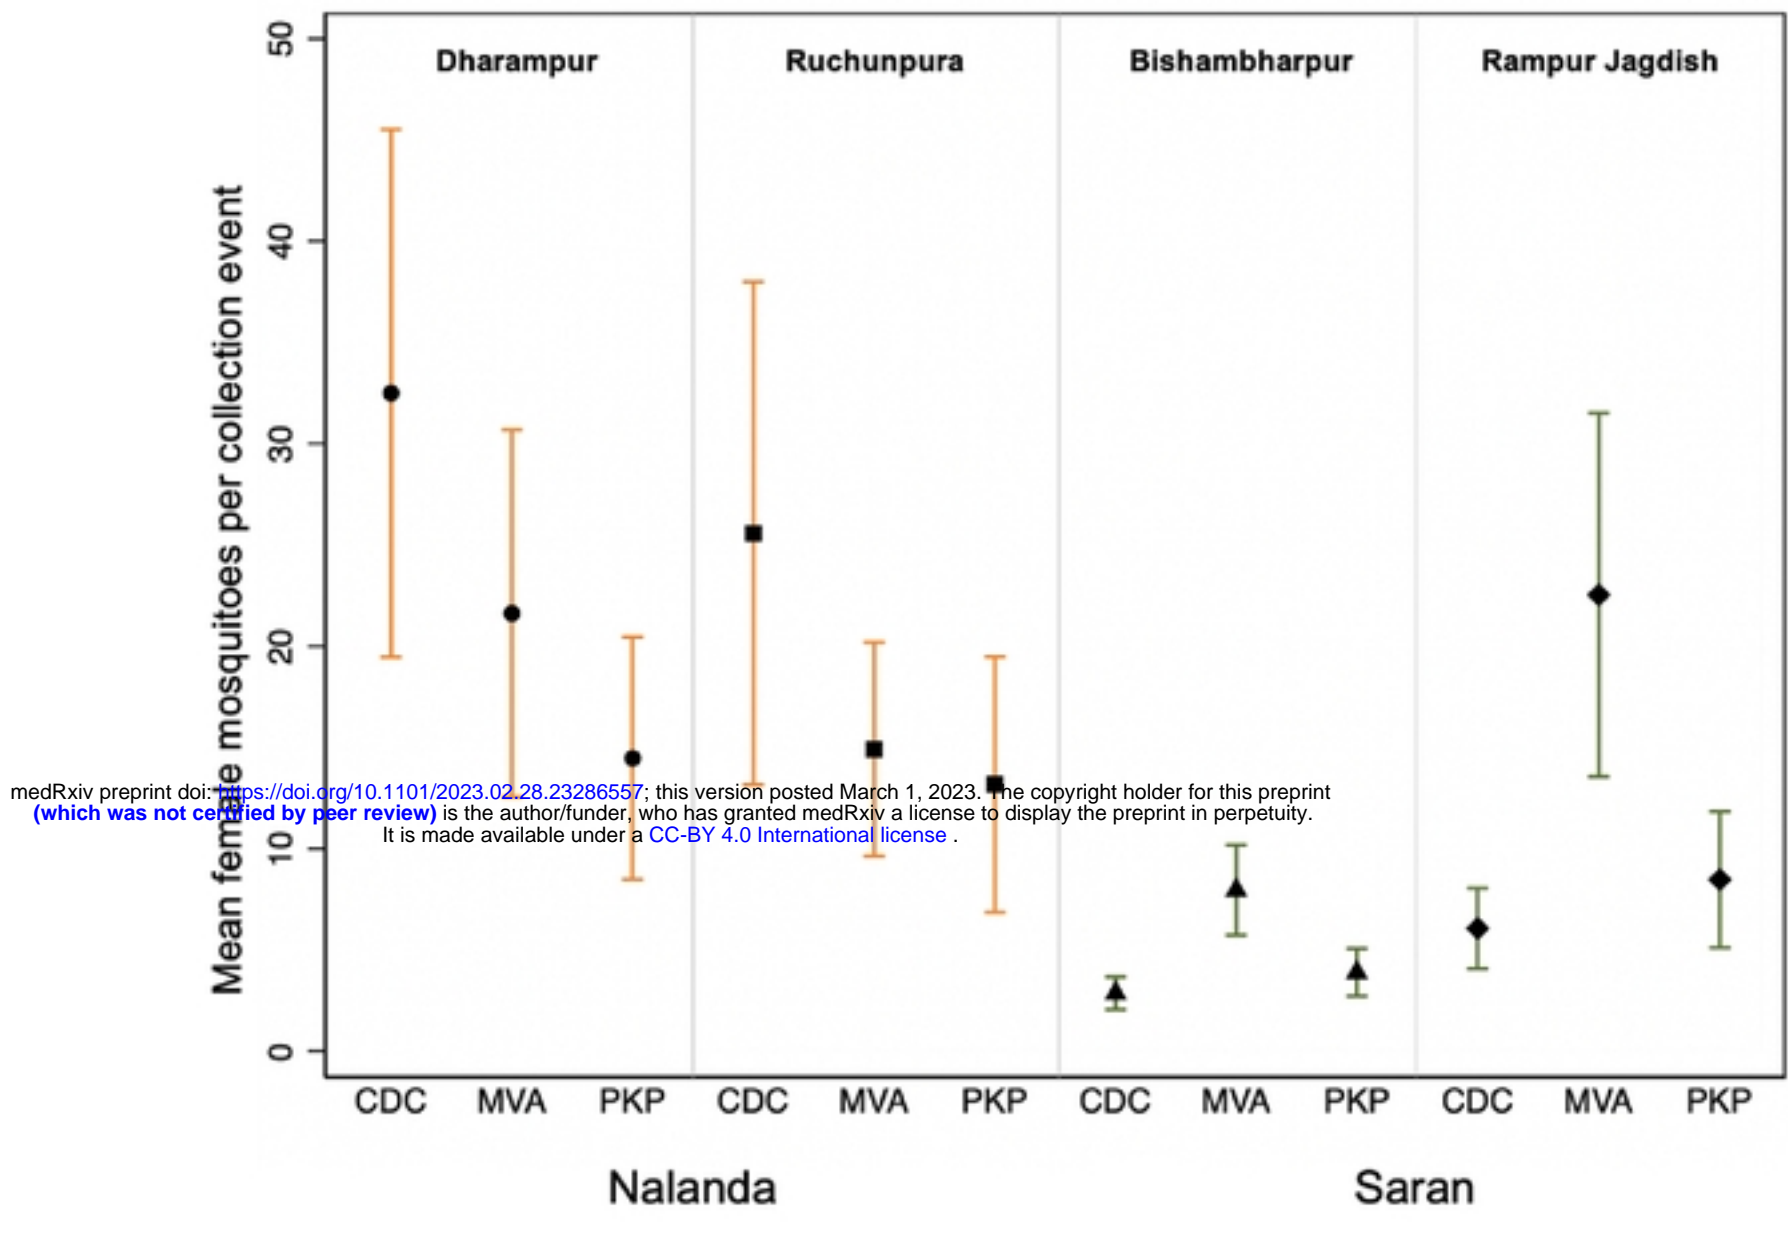

Figure 4

medRxiv preprint doi: <https://doi.org/10.1101/2023.02.28.23286557>; this version posted March 1, 2023. The copyright holder for this preprint (which was not certified by peer review) is the author/funder, who has granted medRxiv a license to display the preprint in perpetuity. It is made available under a [CC-BY 4.0 International license](https://creativecommons.org/licenses/by/4.0/).

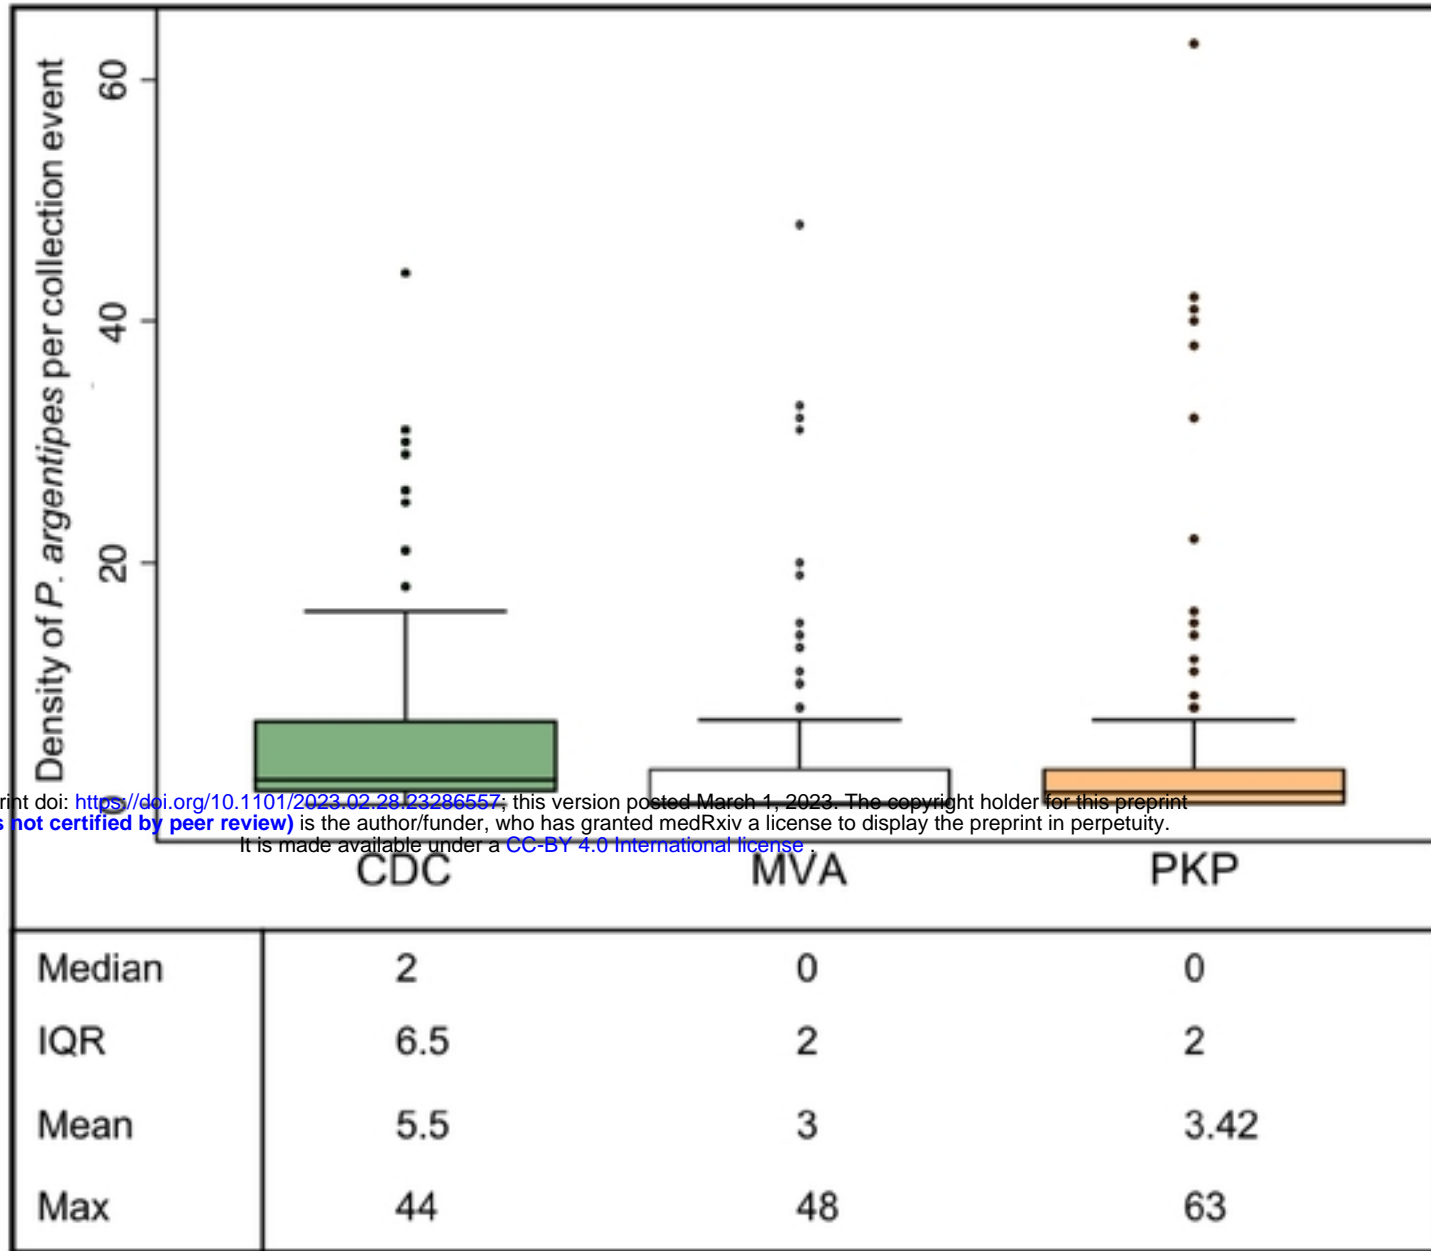

Figure 5



medRxiv preprint doi: <https://doi.org/10.1101/2023.02.28.23286557>; this version posted March 1, 2023. The copyright holder for this preprint (which was not certified by peer review) is the author/funder, who has granted medRxiv a license to display the preprint in perpetuity. It is made available under a [CC-BY 4.0 International license](https://creativecommons.org/licenses/by/4.0/).

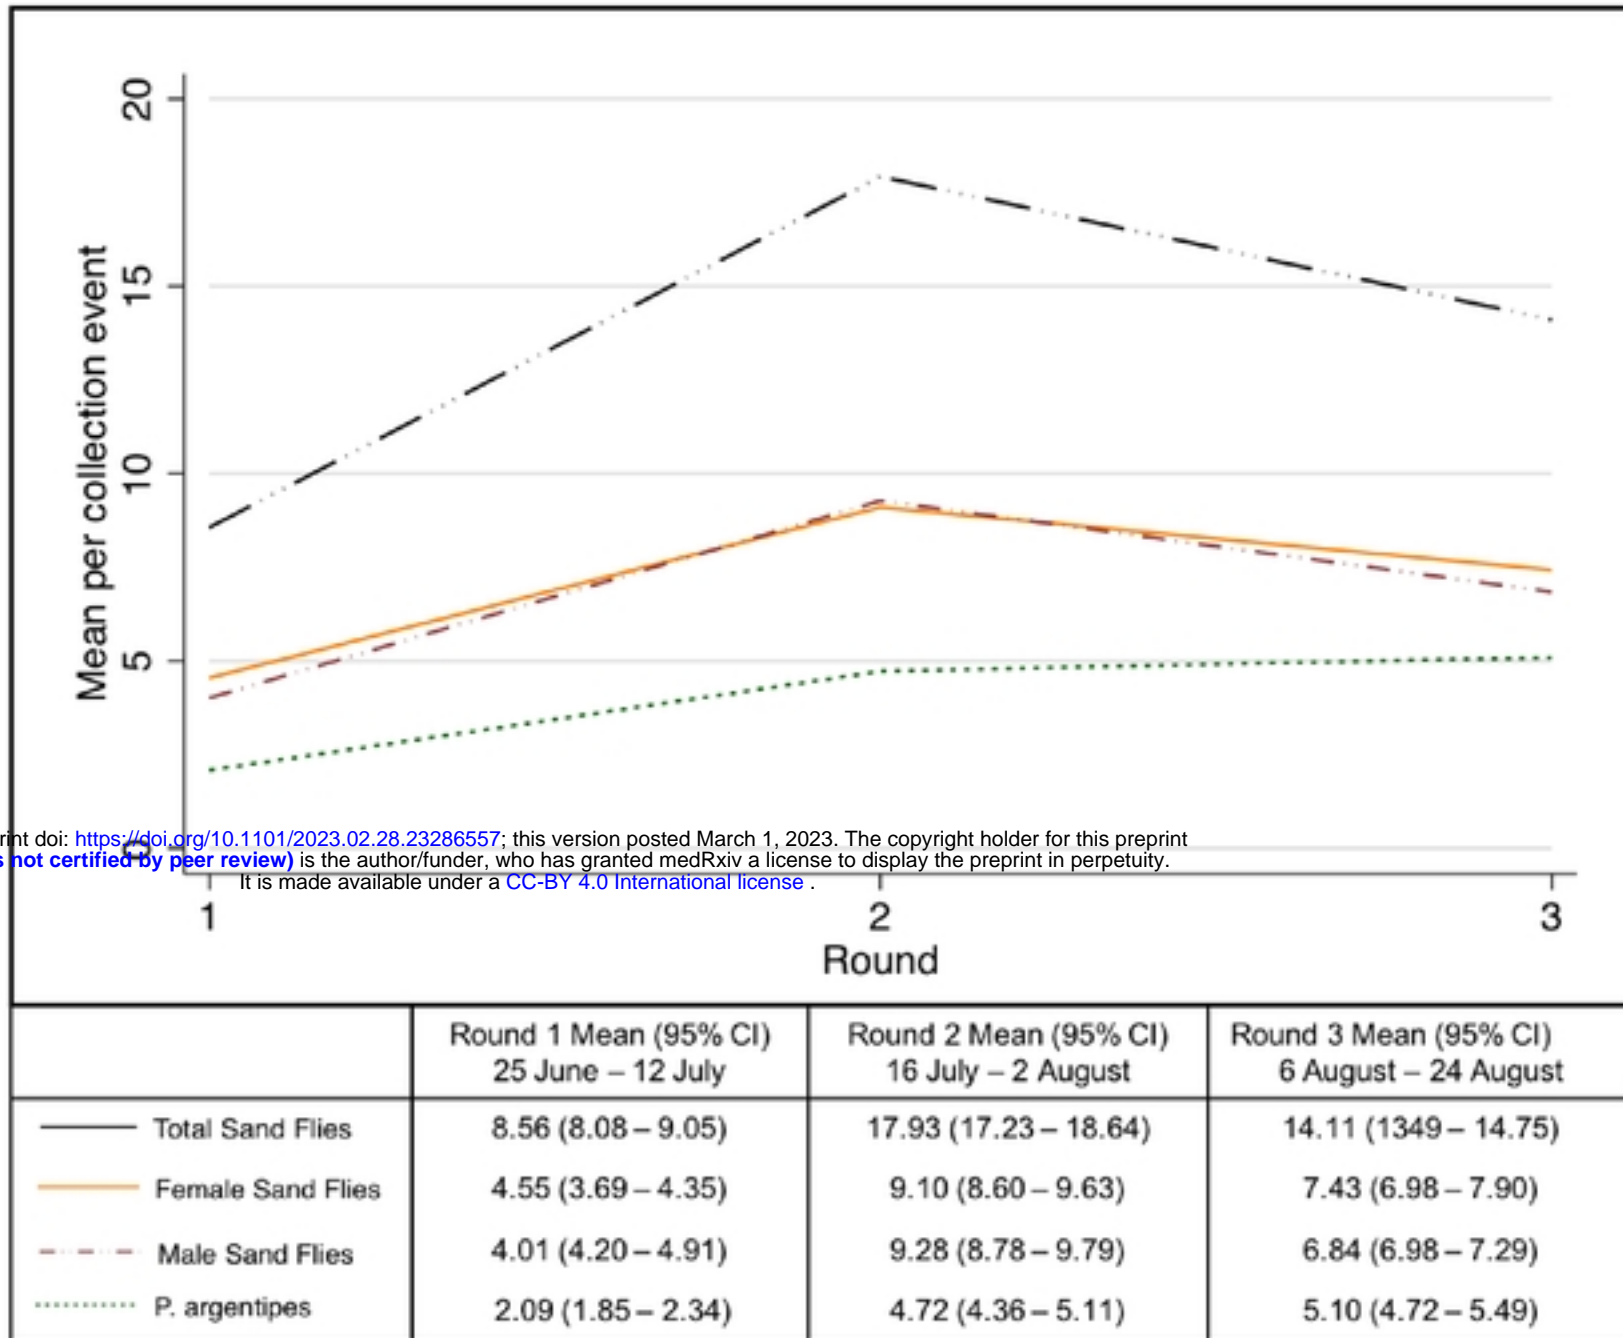

Figure 6

A

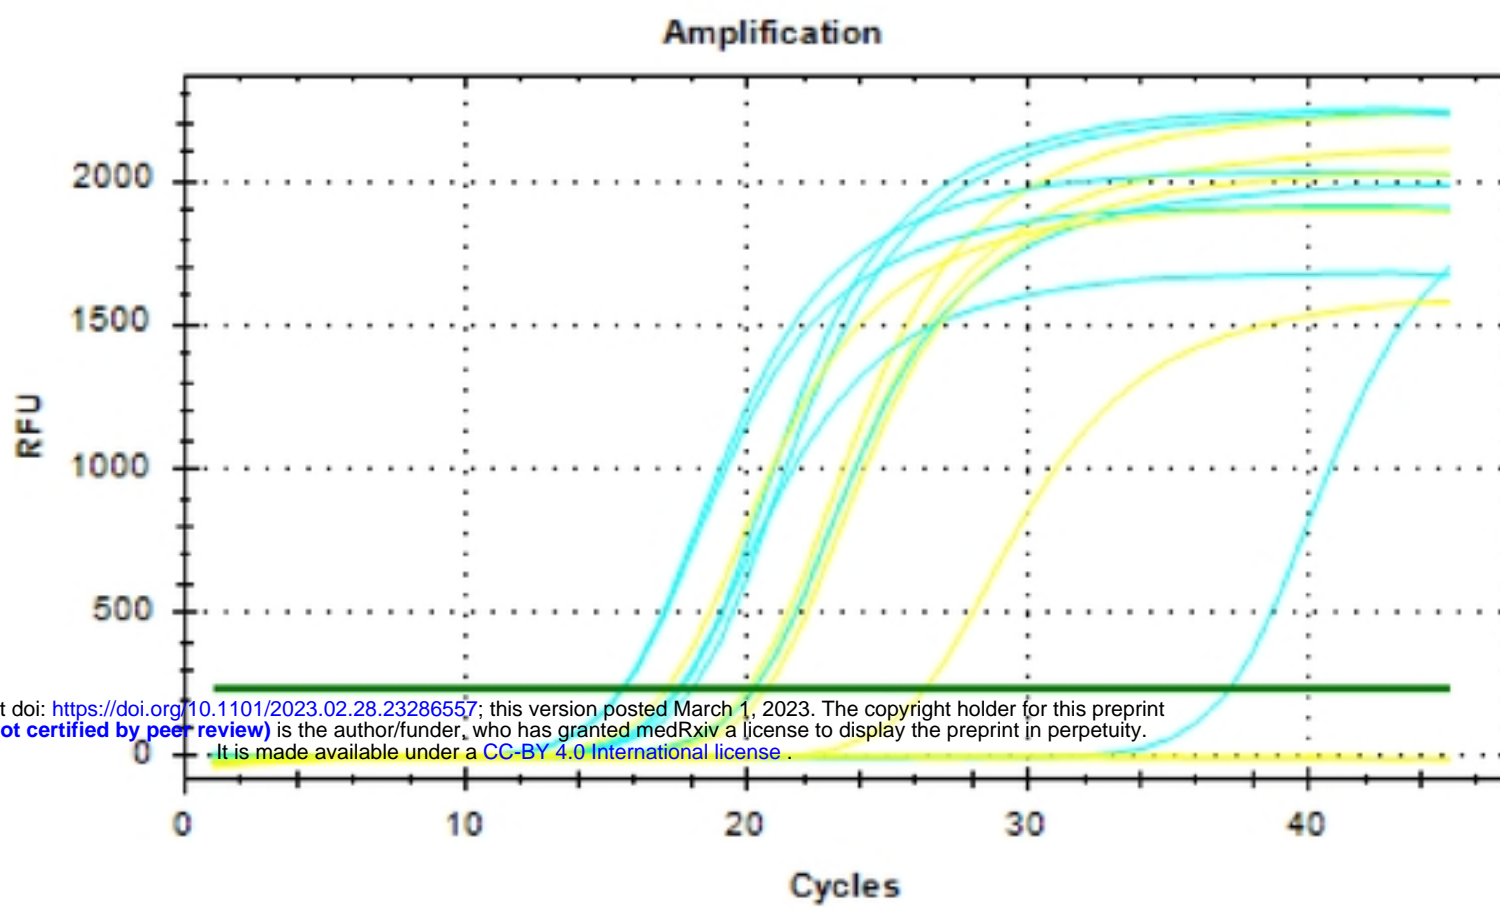

B

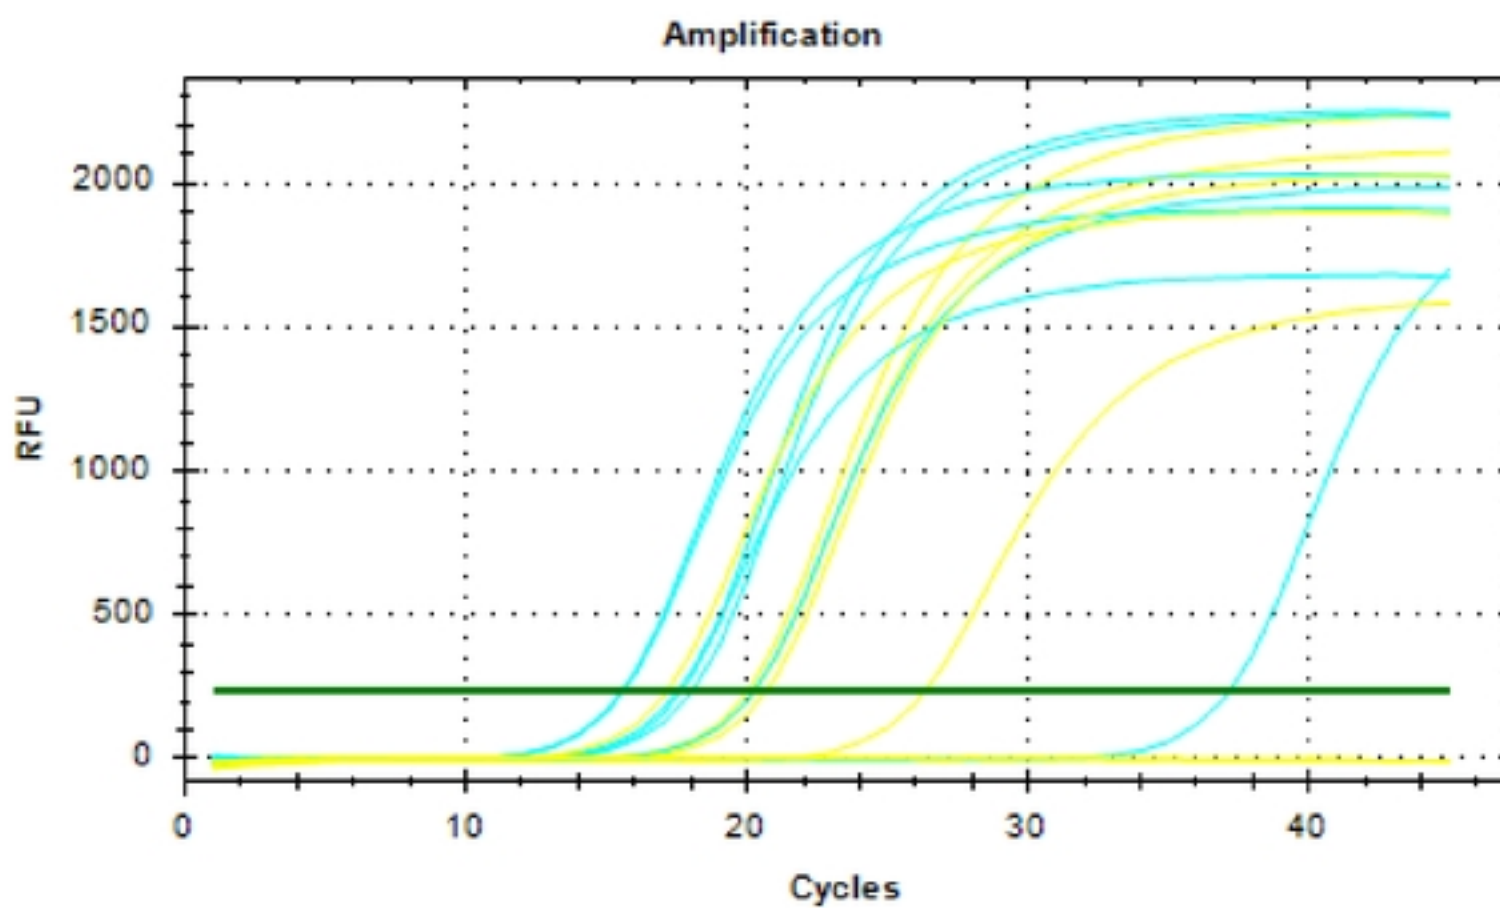

Figure 7
